# Supplementary material for: Meta-analysis of Gender Performance Gaps in Undergraduate Natural Science Courses
Source: PubMed Central journal article supplement — CBE Life Sci Educ. 2021 Fall;20(3):ar40. doi: 10.1187/cbe.20-11-0260 (PMC8715812; doi:10.1187/cbe.20-11-0260), 2021
Supplement: cbe-20-ar40-s001.pdf [file cbe-20-ar40-s001.pdf]

# Supplemental Material

*CBE—Life Sciences Education*

Odom *et al.*

## Supplemental Materials

**Title:** Meta-analysis of gender performance gaps in undergraduate natural science courses

Authors: Sara Odom<sup>1</sup>, Halle Boso<sup>1</sup>, Scott Bowling<sup>1</sup>, Sara Brownell<sup>2</sup>, Sehoya Cotner<sup>3</sup>, Catherine Creech<sup>4</sup>, Abby Grace Drake<sup>5</sup>, Sarah Eddy<sup>6</sup>, Sheritta Fagbodun<sup>7</sup>, Sadie Hebert<sup>3</sup>, Avis C. James<sup>8</sup>, Jan Just<sup>9</sup>, Justin R. St. Juliana<sup>5</sup>, Michele Shuster<sup>8</sup>, Seth K. Thompson<sup>3</sup>, Richard Whittington<sup>7</sup>, Bill D. Wills<sup>1</sup>, Alan E. Wilson<sup>1</sup>, Kelly R. Zamudio<sup>5</sup>, Min Zhong<sup>1</sup>, & Cissy J. Ballen<sup>1</sup>

<sup>1</sup>Auburn University, Auburn, AL

<sup>2</sup>Arizona State University, Tempe, AZ

<sup>3</sup>University of Minnesota – Twin Cities, Minneapolis, MN

<sup>4</sup>Mt. Hood Community College, Gresham, OR

<sup>5</sup>Cornell University, Ithaca, NY

<sup>6</sup>Florida International University, Miami, FL

<sup>7</sup>Tuskegee University, Tuskegee, AL

<sup>8</sup>New Mexico State University, Las Cruces, NM

<sup>9</sup>Portland Community College, Portland, OR

### Supplemental materials include:

Published studies included in meta-analysis.

**Table S1.** Full dataset.

**Table S2.** Descriptive categories of institutions and courses included in the meta-analysis.

**Table S3.** Qualitative descriptions of pedagogies.

**Table S4.** Analyses of subsets of data.

**Figure S1.** PRISMA flow diagram of data collection.

**Figure S2.** Full forest plot.

### **Published studies included in meta-analysis**

- Bardi, M., Koone, T., Mewaldt, S., & O'Connor, K. (2011). Behavioral and physiological correlates of stress related to examination performance in college chemistry students. *Stress, 14*(5), 557–566. <https://doi.org/10.3109/10253890.2011.571322>
- Boli, J., Allen, M. L., & Payne, A. (1985). High-ability women and men in undergraduate mathematics and chemistry courses. *American Educational Research Journal, 22*(4), 605–626. <https://doi.org/10.3102/00028312022004605>
- Bolt, B. (2009). Measuring the impact of varied instructional approaches in an introductory animal science course. *All Dissertations, 483*.
- Cotner, S., & Ballen, C. J. (2017). Can mixed assessment methods make biology classes more equitable? *PLOS ONE, 12*(12), e0189610. <https://doi.org/10.1371/journal.pone.0189610>
- Cromley, J. G., Perez, T., Wills, T. W., Tanaka, J. C., Horvat, E. M., & Agbenyega, E. T.-B. (2013). Changes in race and sex stereotype threat among diverse STEM students: Relation to grades and retention in the majors. *Contemporary Educational Psychology, 38*(3), 247–258. <https://doi.org/10.1016/j.cedpsych.2013.04.003>
- Eddy, S. L., Brownell, S. E., & Wenderoth, M. P. (2014). Gender gaps in achievement and participation in multiple introductory biology classrooms. *CBE—Life Sciences Education, 13*(3), 478–492. <https://doi.org/10.1187/cbe.13-10-0204>
- Gross, D., Pietri, E. S., Anderson, G., Moyano-Camihort, K., & Graham, M. J. (2015). Increased pre-class preparation underlies student outcome improvement in the flipped classroom. *CBE Life Sciences Education, 14*(4), ar36. <https://doi.org/10.1187/cbe.15-02-0040>
- Lax, N., Morris, J., & Kolber, B. J. (2017). A partial flip classroom exercise in a large introductory general biology course increases performance at multiple levels. *Journal of Biological Education, 51*(4), 412–426. <https://doi.org/10.1080/00219266.2016.1257503>
- Niemeyer, E. D., & Zewail-Foote, M. (2018). Investigating the influence of gender on student perceptions of the clicker in a small undergraduate general chemistry course. *Journal of Chemical Education, 95*(2), 218–223. <https://doi.org/10.1021/acs.jchemed.7b00389>

- Peterfreund, A. R., Rath, K. A., Xenos, S. P., & Bayliss, F. (2008). The impact of supplemental instruction on students in stem courses: results from San Francisco State University. *Journal of College Student Retention: Research, Theory & Practice*, 9(4), 487–503.  
<https://doi.org/10.2190/CS.9.4.e>
- Rauschenberger, Matthew M.; Sweeder, Ryan D. (2010). Gender performance differences in biochemistry. *Biochemistry and Molecular Biology Education*, 38(6), 380–384.  
<https://doi.org/10.1002/bmb.20448>
- Rhodes, A. E. (2013). *The effect of teacher designed multimedia on student comprehension and retention rates within introductory college science courses*. <https://krex.k-state.edu/dspace/handle/2097/15513>
- Rodriguez, M., Mundy, M.-A., Kupczynski, L., & Challoo, L. (2018). Effects of teaching strategies on student success, persistence, and perceptions of course evaluations. *Research in Higher Education Journal*, 35. <https://eric.ed.gov/?id=EJ1194444>
- Shibley, I. A., Milakofsky, L. M., Bender, D. S., & Patterson, H. O. (2003). College chemistry and piaget: an analysis of gender difference, cognitive abilities, and achievement measures seventeen years apart. *Journal of Chemical Education*, 80(5), 569. <https://doi.org/10.1021/ed080p569>
- Stanich, C. A., A. Pelch, M., J. Theobald, E., & Freeman, S. (2018). A new approach to supplementary instruction narrows achievement and affect gaps for underrepresented minorities, first-generation students, and women. *Chemistry Education Research and Practice*, 19(3), 846–866.  
<https://doi.org/10.1039/C8RP00044A>
- Sunny, C. E., Taasoobshirazi, G., Clark, L., & Marchand, G. (2017). Stereotype threat and gender differences in chemistry. *Instructional Science*, 45(2), 157–175. <https://doi.org/10.1007/s11251-016-9395-8>
- Williams, A. E., Aguilar-Roca, N. M., & O'Dowd, D. K. (2016). Lecture capture podcasts: Differential student use and performance in a large introductory course. *Educational Technology Research and Development*, 64(1), 1–12. <https://doi.org/10.1007/s11423-015-9406-5>

Willoughby, S. D., & Metz, A. (2009). Exploring gender differences with different gain calculations in astronomy and biology. *American Journal of Physics*, 77(7), 651–657.

<https://doi.org/10.1119/1.3133087>

**Table S1.** Full dataset.

| <b>study no.</b> | <b>yi</b> | <b>vi</b> | <b>assessment</b> | <b>Intro.or.nonintro</b> | <b>biol.or.chem</b> | <b>ped_cat</b> | <b>class_size</b> | <b>title</b>                  | <b>subject</b>                  | <b>institution</b>                 |
|------------------|-----------|-----------|-------------------|--------------------------|---------------------|----------------|-------------------|-------------------------------|---------------------------------|------------------------------------|
| 1                | 0.427     | 0.079     | course            | intro                    | biol                | lecture        | 53                | Research Coordination Network | intro to living systems         | california state university, chico |
| 2                | 0.777     | 0.239     | course            | intro                    | biol                | lecture        | 35                | Research Coordination Network | intro to living systems         | california state university, chico |
| 3                | 0.205     | 0.122     | course            | intro                    | biol                | lecture        | 23                | Research Coordination Network | intro to living systems         | california state university, chico |
| 4                | 0.148     | 0.027     | course            | intro                    | biol                | lecture        | 155               | Research Coordination Network | intro to living systems         | california state university, chico |
| 5                | 0.248     | 0.211     | course            | non-intro                | biol                | lecture        | 29                | Research Coordination Network | biol of sex                     | california state university, chico |
| 6                | 0.577     | 0.191     | course            | non-intro                | biol                | lecture        | 53                | Research Coordination Network | biol of sex                     | california state university, chico |
| 7                | 1.173     | 0.212     | course            | non-intro                | biol                | lecture        | 23                | Research Coordination Network | biol of sex                     | california state university, chico |
| 8                | -0.811    | 0.311     | course            | intro                    | biol                | NA             | 17                | Research Coordination Network | intro to biol                   | capital community college          |
| 9                | -0.779    | 0.352     | course            | intro                    | biol                | NA             | 26                | Research Coordination Network | intro to biol                   | capital community college          |
| 10               | -0.055    | 0.054     | course            | intro                    | biol                | active         | 243               | Research Coordination Network | ecology                         | cornell university                 |
| 11               | -0.412    | 0.024     | course            | non-intro                | biol                | lecture        | 184               | Research Coordination Network | Evolutionary biol and diversity | cornell university                 |
| 12               | 0.084     | 0.117     | course            | intro                    | biol                | NA             | 40                | Research Coordination Network | gen biol I                      | finger lakes community college     |
| 13               | -0.014    | 0.268     | course            | intro                    | biol                | NA             | 17                | Research Coordination Network | gen biol II                     | finger lakes community college     |
| 14               | 0.02      | 0.044     | course            | intro                    | biol                | lecture        | 184               | Research Coordination Network | Natural History of Life         | new mexico state university        |

|    |        |       |        |           |      |         |     |                               |                              |                             |
|----|--------|-------|--------|-----------|------|---------|-----|-------------------------------|------------------------------|-----------------------------|
| 15 | -0.215 | 0.045 | course | intro     | biol | lecture | 190 | Research Coordination Network | Natural History of Life      | new mexico state university |
| 16 | 0.79   | 0.039 | course | intro     | biol | lecture | 185 | Research Coordination Network | Natural History of Life      | new mexico state university |
| 17 | 0.586  | 0.105 | course | intro     | biol | lecture | 96  | Research Coordination Network | human biol                   | new mexico state university |
| 18 | 0.932  | 0.101 | course | intro     | biol | lecture | 93  | Research Coordination Network | human biol                   | new mexico state university |
| 19 | -0.336 | 0.046 | course | intro     | biol | lecture | 180 | Research Coordination Network | Natural History of Life      | new mexico state university |
| 20 | 0.139  | 0.075 | course | intro     | biol | lecture | 131 | Research Coordination Network | Natural History of Life      | new mexico state university |
| 21 | -0.305 | 0.055 | course | intro     | biol | lecture | 136 | Research Coordination Network | Natural History of Life      | new mexico state university |
| 22 | 0.051  | 0.081 | course | non-intro | biol | lecture | 102 | Research Coordination Network | Cellular and Organismal biol | new mexico state university |
| 23 | -2.145 | 0.567 | course | intro     | biol | lecture | 21  | Research Coordination Network | biol                         | portland community college  |
| 24 | 0.37   | 0.262 | course | intro     | biol | active  | 20  | Research Coordination Network | biol                         | portland community college  |
| 25 | -0.838 | 0.629 | course | intro     | biol | active  | 14  | Research Coordination Network | biol                         | portland community college  |
| 26 | -0.711 | 0.466 | course | intro     | biol | active  | 12  | Research Coordination Network | biol                         | portland community college  |
| 27 | 0.123  | 0.584 | course | intro     | biol | active  | 14  | Research Coordination Network | biol                         | portland community college  |
| 28 | -0.425 | 0.267 | course | intro     | biol | active  | 24  | Research Coordination Network | Cell biol for Health OCC     | portland community college  |
| 29 | 0.31   | 0.246 | course | intro     | biol | lecture | 26  | Research Coordination Network | Cell biol for Health OCC     | portland community college  |

|    |        |       |        |           |      |         |    |                               |                               |                            |
|----|--------|-------|--------|-----------|------|---------|----|-------------------------------|-------------------------------|----------------------------|
| 30 | 0.023  | 0.292 | course | intro     | biol | lecture | 17 | Research Coordination Network | Cell biol for Health OCC      | portland community college |
| 31 | -0.196 | 0.351 | course | intro     | biol | lecture | 15 | Research Coordination Network | Intro Human Anatomy/Phys I    | portland community college |
| 32 | -0.203 | 0.503 | course | intro     | biol | lecture | 15 | Research Coordination Network | Intro Human Anatomy/Phys I    | portland community college |
| 33 | -0.315 | 0.246 | course | intro     | biol | active  | 22 | Research Coordination Network | Habitats: Life of the Forest  | portland community college |
| 34 | -0.41  | 0.282 | course | intro     | biol | active  | 23 | Research Coordination Network | Principles of biol            | portland community college |
| 35 | 0.785  | 0.359 | course | intro     | biol | active  | 18 | Research Coordination Network | Principles of biol            | portland community college |
| 36 | -0.504 | 0.25  | course | non-intro | biol | active  | 23 | Research Coordination Network | Human Anatomy & Physiology I  | portland community college |
| 37 | -0.806 | 0.565 | course | non-intro | biol | active  | 24 | Research Coordination Network | Human Anatomy & Physiology I  | portland community college |
| 38 | -0.144 | 0.272 | course | non-intro | biol | active  | 24 | Research Coordination Network | Human Anatomy & Physiology I  | portland community college |
| 39 | 0.535  | 0.639 | course | non-intro | biol | active  | 14 | Research Coordination Network | Human Anatomy & Physiology II | portland community college |
| 40 | -0.539 | 0.457 | course | non-intro | biol | active  | 17 | Research Coordination Network | Human Anatomy & Physiology II | portland community college |
| 41 | 0.755  | 0.36  | course | non-intro | biol | active  | 19 | Research Coordination Network | Human Anatomy & Physiology II | portland community college |
| 42 | 0.66   | 0.296 | course | non-intro | biol | lecture | 25 | Research Coordination Network | Microbiol                     | portland community college |
| 43 | -0.275 | 0.462 | course | non-intro | biol | lecture | 15 | Research Coordination Network | Microbiol                     | portland community college |
| 44 | -0.401 | 0.159 | course | intro     | biol | lecture | 50 | Research Coordination Network | Organismic biol               | tuskegee university        |



|    |        |       |        |       |      |        |     |                               |                                                       |                         |
|----|--------|-------|--------|-------|------|--------|-----|-------------------------------|-------------------------------------------------------|-------------------------|
|    |        |       |        |       |      |        |     | Network                       |                                                       |                         |
| 45 | 0.036  | 0.015 | course | intro | biol | active | 273 | Research Coordination Network | intro biol: Evolutionary and Ecological Persepectives | university of minnesota |
| 46 | -0.184 | 0.014 | course | intro | biol | active | 293 | Research Coordination Network | intro biol: Evolutionary and Ecological Persepectives | university of minnesota |
| 47 | 0.237  | 0.025 | course | intro | biol | active | 173 | Research Coordination Network | intro biol: Evolutionary and Ecological Persepectives | university of minnesota |
| 48 | -0.014 | 0.023 | course | intro | biol | active | 179 | Research Coordination Network | intro biol: Evolutionary and Ecological Persepectives | university of minnesota |
| 49 | 0.475  | 0.037 | course | intro | biol | active | 118 | Research Coordination Network | Evolution and biol of sex                             | university of minnesota |
| 50 | 0.099  | 0.037 | course | intro | biol | active | 118 | Research Coordination Network | Evolution and biol of sex                             | university of minnesota |
| 51 | 0.416  | 0.022 | course | intro | biol | active | 190 | Research Coordination Network | Evolution and biol of sex                             | university of minnesota |
| 52 | 0.596  | 0.037 | course | intro | biol | active | 113 | Research Coordination Network | Evolution and biol of sex                             | university of minnesota |
| 53 | 0.108  | 0.035 | course | intro | biol | active | 117 | Research Coordination Network | Evolution and biol of sex                             | university of minnesota |

|    |        |       |        |       |      |        |     |                               |                                                 |                         |
|----|--------|-------|--------|-------|------|--------|-----|-------------------------------|-------------------------------------------------|-------------------------|
| 54 | -0.067 | 0.023 | course | intro | biol | active | 187 | Research Coordination Network | Evolution and biol of sex                       | university of minnesota |
| 55 | 0.172  | 0.031 | course | intro | biol | active | 158 | Research Coordination Network | gen biol                                        | university of minnesota |
| 56 | 0.036  | 0.023 | course | intro | biol | active | 181 | Research Coordination Network | gen biol                                        | university of minnesota |
| 57 | -0.118 | 0.016 | course | intro | biol | active | 260 | Research Coordination Network | gen biol                                        | university of minnesota |
| 58 | -0.159 | 0.037 | course | intro | biol | active | 113 | Research Coordination Network | Human biol: Concepts and Current Ethical Issues | university of minnesota |
| 59 | 0.327  | 0.037 | course | intro | biol | active | 111 | Research Coordination Network | Human biol: Concepts and Current Ethical Issues | university of minnesota |
| 60 | -0.114 | 0.027 | course | intro | biol | NA     | 160 | Research Coordination Network | Environmental biol: Science and Solutions       | university of minnesota |
| 61 | 0.07   | 0.025 | course | intro | biol | NA     | 165 | Research Coordination Network | Environmental biol: Science and Solutions       | university of minnesota |
| 62 | 0.155  | 0.054 | course | intro | chem | active | 93  | Research Coordination Network | gen Zoology                                     | university of minnesota |
| 63 | -0.583 | 0.041 | course | intro | chem | NA     | 103 | Research Coordination Network | Chemical Principles I                           | university of minnesota |
| 64 | -0.77  | 0.061 | course | intro | chem | NA     | 77  | Research Coordination Network | Chemical Principles I                           | university of minnesota |

|    |        |       |        |           |      |         |     |                                |                        |                                |
|----|--------|-------|--------|-----------|------|---------|-----|--------------------------------|------------------------|--------------------------------|
| 65 | -0.02  | 0.075 | course | intro     | chem | NA      | 58  | Research Coordination Network  | Chemical Principles I  | university of minnesota        |
| 66 | -0.164 | 0.258 | course | intro     | chem | NA      | 36  | Research Coordination Network  | intro to Chemical biol | university of minnesota        |
| 67 | 0.387  | 0.046 | course | non-intro | biol | NA      | 97  | Research Coordination Network  | Evolution              | university of minnesota        |
| 68 | 0.686  | 0.059 | course | intro     | biol | active  | 95  | Research Coordination Network  | intro biol             | university of new hampshire    |
| 69 | 0.114  | 0.045 | course | intro     | biol | active  | 99  | Cotner & Ballen, 2018          | intro biol             | university of minnesota        |
| 70 | -0.065 | 0.032 | course | intro     | biol | active  | 129 | Cotner & Ballen, 2018          | intro biol             | university of minnesota        |
| 71 | -0.664 | 0.056 | course | non-intro | biol | lecture | 78  | Cotner & Ballen, 2018          | Evolution              | university of minnesota        |
| 72 | 0.194  | 0.048 | course | non-intro | biol | lecture | 86  | Cotner & Ballen, 2018          | Evolution              | university of minnesota        |
| 73 | 0.134  | 0.026 | course | intro     | biol | active  | 156 | Cotner & Ballen, 2018          | intro biol             | university of minnesota        |
| 74 | -0.087 | 0.026 | course | intro     | biol | active  | 154 | Cotner & Ballen, 2018          | intro biol             | university of minnesota        |
| 75 | 0.29   | 0.036 | course | intro     | biol | active  | 158 | Auburn U. dataset              | intro biol             | auburn university              |
| 76 | 0.274  | 0.065 | course | intro     | biol | active  | 79  | Auburn U. dataset              | intro biol             | auburn university              |
| 77 | 0.032  | 0.025 | course | intro     | biol | active  | 216 | Auburn U. dataset              | intro biol             | auburn university              |
| 78 | 0.265  | 0.033 | course | intro     | biol | active  | 196 | Auburn U. dataset              | intro biol             | auburn university              |
| 79 | -0.259 | 0.025 | course | intro     | biol | active  | 202 | Auburn U. dataset              | organismal biol        | auburn university              |
| 80 | 0.004  | 0.027 | course | intro     | biol | lecture | 203 | Auburn U. dataset              | organismal biol        | auburn university              |
| 81 | -0.236 | 0.038 | course | intro     | biol | active  | 149 | Auburn U. dataset              | organismal biol        | auburn university              |
| 82 | 0.175  | 0.021 | course | intro     | biol | lecture | 211 | Auburn U. dataset              | organismal biol        | auburn university              |
| 83 | -0.1   | 0.001 | course | non-intro | chem | lecture | 466 | Rauschenberger & Sweeder, 2010 | Biochem I              | michigan state university      |
| 84 | -0.056 | 0.001 | course | non-intro | chem | lecture | 466 | Rauschenberger & Sweeder, 2010 | Biochem II             | michigan state university      |
| 85 | 0.226  | 0.055 | course | intro     | chem | lecture | NA  | Shibley et al., 2013           | intro chem             | unknown 2                      |
| 86 | 0.259  | 0.004 | course | intro     | biol | NA      | NA  | Peterfreund et al., 2008       | Intro biol I           | san francisco state university |

|     |        |       |        |           |      |    |    |                          |                                 |                                |
|-----|--------|-------|--------|-----------|------|----|----|--------------------------|---------------------------------|--------------------------------|
| 87  | -0.517 | 0.013 | course | intro     | biol | NA | NA | Peterfreund et al., 2008 | Intro biol I                    | san francisco state university |
| 88  | 0.155  | 0.007 | course | intro     | biol | NA | NA | Peterfreund et al., 2008 | Intro biol II                   | san francisco state university |
| 89  | 0.181  | 0.025 | course | intro     | biol | NA | NA | Peterfreund et al., 2008 | Intro biol II                   | san francisco state university |
| 90  | 0.414  | 0.008 | course | non-intro | biol | NA | NA | Peterfreund et al., 2008 | Genetics                        | san francisco state university |
| 91  | -0.155 | 0.024 | course | non-intro | biol | NA | NA | Peterfreund et al., 2008 | Genetics                        | san francisco state university |
| 92  | 0.129  | 0.009 | course | intro     | chem | NA | NA | Peterfreund et al., 2008 | Gen Chem I                      | san francisco state university |
| 93  | 0.509  | 0.098 | course | intro     | chem | NA | NA | Peterfreund et al., 2008 | Gen Chem I                      | san francisco state university |
| 94  | -0.388 | 0.003 | course | intro     | chem | NA | NA | Peterfreund et al., 2008 | Gen Chem I: Concepts            | san francisco state university |
| 95  | -0.233 | 0.018 | course | intro     | chem | NA | NA | Peterfreund et al., 2008 | Gen Chem I: Concepts            | san francisco state university |
| 96  | 0.078  | 0.011 | course | intro     | chem | NA | NA | Peterfreund et al., 2008 | Gen Chem II                     | san francisco state university |
| 97  | -0.204 | 0.104 | course | intro     | chem | NA | NA | Peterfreund et al., 2008 | Gen Chem II                     | san francisco state university |
| 98  | 0.207  | 0.01  | course | intro     | chem | NA | NA | Peterfreund et al., 2008 | Gen Chem II: Quant. Application | san francisco state university |
| 99  | 0.077  | 0.06  | course | intro     | chem | NA | NA | Peterfreund et al., 2008 | Gen Chem II: Quant. Application | san francisco state university |
| 100 | 0      | 0.007 | course | non-intro | chem | NA | NA | Peterfreund et al., 2008 | Organic Chem I                  | san francisco state university |
| 101 | -0.774 | 0.023 | course | non-intro | chem | NA | NA | Peterfreund et al., 2008 | Organic Chem I                  | san francisco state university |
| 102 | -0.155 | 0.009 | course | non-intro | chem | NA | NA | Peterfreund et al., 2008 | Organic Chem II                 | san francisco state university |
| 103 | -0.026 | 0.042 | course | non-intro | chem | NA | NA | Peterfreund et al., 2008 | Organic Chem II                 | san francisco state            |

|     |        |       |        |           |      |         |     |                               |                         |                                    |
|-----|--------|-------|--------|-----------|------|---------|-----|-------------------------------|-------------------------|------------------------------------|
|     |        |       |        |           |      |         |     |                               |                         | university                         |
| 104 | 0.078  | 0.015 | course | non-intro | chem | NA      | NA  | Peterfreund et al., 2008      | Biochem I               | san francisco state university     |
| 105 | -0.026 | 0.057 | course | non-intro | chem | NA      | NA  | Peterfreund et al., 2008      | Biochem I               | san francisco state university     |
| 106 | 0.129  | 0.021 | course | non-intro | chem | NA      | NA  | Peterfreund et al., 2008      | Biochem II              | san francisco state university     |
| 107 | -0.179 | 0.073 | course | non-intro | chem | NA      | NA  | Peterfreund et al., 2008      | Biochem II              | san francisco state university     |
| 108 | -1.034 | 0.006 | course | intro     | chem | NA      | NA  | Boli et al., 1985             | intro chem              | stanford                           |
| 109 | 0.206  | 0.033 | course | intro     | biol | active  | 155 | Bolt, 2009                    | intro animal sciences   | clemson university                 |
| 110 | -0.215 | 0.045 | course | intro     | biol | NA      | 190 | Research Coordination Network | biol                    | new mexico state university        |
| 111 | 0.79   | 0.039 | course | intro     | biol | NA      | 185 | Research Coordination Network | biol                    | new mexico state university        |
| 112 | 0.586  | 0.105 | course | intro     | biol | NA      | 96  | Research Coordination Network | biol                    | new mexico state university        |
| 113 | 0.932  | 0.101 | course | intro     | biol | NA      | 93  | Research Coordination Network | biol                    | new mexico state university        |
| 114 | 4.326  | 0.048 | course | intro     | biol | lecture | 300 | Cromley et al., 2013          | intro biol              | unknown 4                          |
| 115 | 0.182  | 0.077 | exams  | intro     | biol | lecture | 53  | Research Coordination Network | intro to living systems | california state university, chico |
| 116 | -0.494 | 0.231 | exams  | intro     | biol | lecture | 35  | Research Coordination Network | intro to living systems | california state university, chico |
| 117 | 0.198  | 0.122 | exams  | intro     | biol | lecture | 23  | Research Coordination Network | intro to living systems | california state university, chico |
| 118 | -0.059 | 0.027 | exams  | intro     | biol | lecture | 155 | Research Coordination Network | intro to living systems | california state university, chico |
| 119 | 0.294  | 0.212 | exams  | non-intro | biol | lecture | 29  | Research Coordination Network | biol of sex             | california state university, chico |

|     |        |       |       |           |      |         |     |                               |                                 |                                    |
|-----|--------|-------|-------|-----------|------|---------|-----|-------------------------------|---------------------------------|------------------------------------|
| 120 | 0.133  | 0.188 | exams | non-intro | biol | lecture | 53  | Research Coordination Network | biol of sex                     | california state university, chico |
| 121 | 0.599  | 0.19  | exams | non-intro | biol | lecture | 23  | Research Coordination Network | biol of sex                     | california state university, chico |
| 122 | -1.005 | 0.322 | exams | intro     | biol | NA      | 17  | Research Coordination Network | intro to biol                   | capital community college          |
| 123 | -0.76  | 0.351 | exams | intro     | biol | NA      | 26  | Research Coordination Network | intro to biol                   | capital community college          |
| 124 | 0.031  | 0.054 | exams | intro     | biol | active  | 243 | Research Coordination Network | ecology                         | cornell university                 |
| 125 | -0.061 | 0.023 | exams | non-intro | biol | lecture | 184 | Research Coordination Network | Evolutionary biol and diversity | cornell university                 |
| 126 | 0.023  | 0.117 | exams | intro     | biol | NA      | 40  | Research Coordination Network | gen biol I                      | finger lakes community college     |
| 127 | 0.62   | 0.281 | exams | intro     | biol | NA      | 17  | Research Coordination Network | gen biol II                     | finger lakes community college     |
| 128 | -0.057 | 0.044 | exams | intro     | biol | lecture | 184 | Research Coordination Network | Natural History of Life         | new mexico state university        |
| 129 | -0.347 | 0.045 | exams | intro     | biol | lecture | 190 | Research Coordination Network | Natural History of Life         | new mexico state university        |
| 130 | 0.496  | 0.038 | exams | intro     | biol | lecture | 185 | Research Coordination Network | Natural History of Life         | new mexico state university        |
| 131 | 0.488  | 0.104 | exams | intro     | biol | lecture | 96  | Research Coordination Network | HUMAN biol                      | new mexico state university        |
| 132 | 0.729  | 0.098 | exams | intro     | biol | lecture | 93  | Research Coordination Network | HUMAN biol                      | new mexico state university        |
| 133 | -0.373 | 0.046 | exams | intro     | biol | lecture | 180 | Research Coordination Network | Natural History of Life         | new mexico state university        |
| 134 | 0.116  | 0.075 | exams | intro     | biol | lecture | 131 | Research Coordination Network | Natural History of Life         | new mexico state university        |

|     |        |       |       |           |      |         |     |                               |                              |                             |
|-----|--------|-------|-------|-----------|------|---------|-----|-------------------------------|------------------------------|-----------------------------|
| 135 | -0.412 | 0.055 | exams | intro     | biol | lecture | 136 | Research Coordination Network | Natural History of Life      | new mexico state university |
| 136 | 0.029  | 0.081 | exams | non-intro | biol | lecture | 102 | Research Coordination Network | Cellular and Organismal biol | new mexico state university |
| 137 | -2.612 | 0.659 | exams | intro     | biol | lecture | 21  | Research Coordination Network | biol                         | portland community college  |
| 138 | 0.169  | 0.258 | exams | intro     | biol | active  | 20  | Research Coordination Network | biol                         | portland community college  |
| 139 | -1.091 | 0.65  | exams | intro     | biol | active  | 14  | Research Coordination Network | biol                         | portland community college  |
| 140 | -0.615 | 0.46  | exams | intro     | biol | active  | 12  | Research Coordination Network | biol                         | portland community college  |
| 141 | 0.14   | 0.585 | exams | intro     | biol | active  | 14  | Research Coordination Network | biol                         | portland community college  |
| 142 | -0.654 | 0.273 | exams | intro     | biol | active  | 24  | Research Coordination Network | Cell biol for Health OCC     | portland community college  |
| 143 | -0.158 | 0.244 | exams | intro     | biol | lecture | 26  | Research Coordination Network | Cell biol for Health OCC     | portland community college  |
| 144 | 0.041  | 0.292 | exams | intro     | biol | lecture | 17  | Research Coordination Network | Cell biol for Health OCC     | portland community college  |
| 145 | -0.351 | 0.354 | exams | intro     | biol | lecture | 15  | Research Coordination Network | Intro Human Anatomy/Phys I   | portland community college  |
| 146 | -0.161 | 0.502 | exams | intro     | biol | lecture | 15  | Research Coordination Network | Intro Human Anatomy/Phys I   | portland community college  |
| 147 | -0.312 | 0.246 | exams | intro     | biol | active  | 22  | Research Coordination Network | Habitats: Life of the Forest | portland community college  |
| 148 | -0.141 | 0.277 | exams | intro     | biol | active  | 23  | Research Coordination Network | Principles of biol           | portland community college  |
| 149 | 0.512  | 0.344 | exams | intro     | biol | active  | 18  | Research Coordination Network | Principles of biol           | portland community college  |

|     |        |       |       |           |      |         |     |                               |                                                       |                            |
|-----|--------|-------|-------|-----------|------|---------|-----|-------------------------------|-------------------------------------------------------|----------------------------|
| 150 | -0.552 | 0.252 | exams | non-intro | biol | active  | 23  | Research Coordination Network | Human Anatomy & Physiology I                          | portland community college |
| 151 | -0.876 | 0.567 | exams | non-intro | biol | active  | 24  | Research Coordination Network | Human Anatomy & Physiology I                          | portland community college |
| 152 | -0.003 | 0.271 | exams | non-intro | biol | active  | 24  | Research Coordination Network | Human Anatomy & Physiology I                          | portland community college |
| 153 | 0.082  | 0.625 | exams | non-intro | biol | active  | 14  | Research Coordination Network | Human Anatomy & Physiology II                         | portland community college |
| 154 | -1.15  | 0.5   | exams | non-intro | biol | active  | 17  | Research Coordination Network | Human Anatomy & Physiology II                         | portland community college |
| 155 | 0.775  | 0.361 | exams | non-intro | biol | active  | 19  | Research Coordination Network | Human Anatomy & Physiology II                         | portland community college |
| 156 | 0.609  | 0.294 | exams | non-intro | biol | lecture | 25  | Research Coordination Network | Microbiol                                             | portland community college |
| 157 | 0.212  | 0.158 | exams | intro     | biol | lecture | 50  | Research Coordination Network | Organismic biol                                       | tuskegee university        |
| 158 | -0.157 | 0.015 | exams | intro     | biol | active  | 273 | Research Coordination Network | intro biol: Evolutionary and Ecological Persepectives | university of minnesota    |
| 159 | -0.317 | 0.014 | exams | intro     | biol | active  | 293 | Research Coordination Network | intro biol: Evolutionary and Ecological Persepectives | university of minnesota    |
| 160 | 0.225  | 0.025 | exams | intro     | biol | active  | 173 | Research Coordination Network | intro biol: Evolutionary and Ecological Persepectives | university of minnesota    |



|     |        |       |       |       |      |        |     |                               |                                                      |                         |
|-----|--------|-------|-------|-------|------|--------|-----|-------------------------------|------------------------------------------------------|-------------------------|
| 161 | -0.043 | 0.023 | exams | intro | biol | active | 179 | Research Coordination Network | intro biol: Evolutionary and Ecological Persepctives | university of minnesota |
| 162 | 0.279  | 0.037 | exams | intro | biol | active | 118 | Research Coordination Network | Evolution and biol of sex                            | university of minnesota |
| 163 | -0.157 | 0.037 | exams | intro | biol | active | 118 | Research Coordination Network | Evolution and biol of sex                            | university of minnesota |
| 164 | 0.152  | 0.022 | exams | intro | biol | active | 190 | Research Coordination Network | Evolution and biol of sex                            | university of minnesota |
| 165 | 0.335  | 0.036 | exams | intro | biol | active | 113 | Research Coordination Network | Evolution and biol of sex                            | university of minnesota |
| 166 | 0.093  | 0.035 | exams | intro | biol | active | 117 | Research Coordination Network | Evolution and biol of sex                            | university of minnesota |
| 167 | -0.211 | 0.023 | exams | intro | biol | active | 187 | Research Coordination Network | Evolution and biol of sex                            | university of minnesota |
| 168 | 0.031  | 0.031 | exams | intro | biol | active | 158 | Research Coordination Network | gen biol                                             | university of minnesota |
| 169 | -0.107 | 0.023 | exams | intro | biol | active | 181 | Research Coordination Network | gen biol                                             | university of minnesota |
| 170 | -0.306 | 0.016 | exams | intro | biol | active | 260 | Research Coordination Network | gen biol                                             | university of minnesota |
| 171 | -0.321 | 0.037 | exams | intro | biol | active | 113 | Research Coordination Network | Human biol: Concepts and Current Ethical Issues      | university of minnesota |

|     |        |       |       |           |      |        |     |                               |                                                 |                             |
|-----|--------|-------|-------|-----------|------|--------|-----|-------------------------------|-------------------------------------------------|-----------------------------|
| 172 | 0.086  | 0.036 | exams | intro     | biol | active | 111 | Research Coordination Network | Human biol: Concepts and Current Ethical Issues | university of minnesota     |
| 173 | -0.262 | 0.027 | exams | intro     | biol | NA     | 160 | Research Coordination Network | Environmental biol: Science and Solutions       | university of minnesota     |
| 174 | -0.158 | 0.025 | exams | intro     | biol | NA     | 165 | Research Coordination Network | Environmental biol: Science and Solutions       | university of minnesota     |
| 175 | 0.012  | 0.054 | exams | intro     | chem | active | 93  | Research Coordination Network | gen Zoology                                     | university of minnesota     |
| 176 | -0.575 | 0.041 | exams | intro     | chem | NA     | 103 | Research Coordination Network | Chemical Principles I                           | university of minnesota     |
| 177 | -0.774 | 0.061 | exams | intro     | chem | NA     | 77  | Research Coordination Network | Chemical Principles I                           | university of minnesota     |
| 178 | 0.006  | 0.075 | exams | intro     | chem | NA     | 58  | Research Coordination Network | Chemical Principles I                           | university of minnesota     |
| 179 | -0.221 | 0.259 | exams | intro     | chem | NA     | 36  | Research Coordination Network | intro to Chemical biol                          | university of minnesota     |
| 180 | 0.415  | 0.046 | exams | non-intro | biol | NA     | 97  | Research Coordination Network | Evolution                                       | university of minnesota     |
| 181 | 0.637  | 0.058 | exams | intro     | biol | active | 95  | Research Coordination Network | intro biol                                      | university of new hampshire |
| 182 | 0.151  | 0.055 | exams | intro     | biol | active | 82  | Cotner & Ballen, 2018         | intro biol                                      | university of minnesota     |
| 183 | -0.187 | 0.047 | exams | intro     | biol | active | 89  | Cotner & Ballen, 2018         | intro biol                                      | university of minnesota     |
| 184 | -0.097 | 0.029 | exams | intro     | biol | active | 148 | Cotner & Ballen, 2018         | intro biol                                      | university of minnesota     |
| 185 | 0.111  | 0.057 | exams | intro     | biol | active | 72  | Cotner & Ballen, 2018         | intro biol                                      | university of minnesota     |

|     |        |       |       |           |      |         |     |                               |                                       |                                     |
|-----|--------|-------|-------|-----------|------|---------|-----|-------------------------------|---------------------------------------|-------------------------------------|
| 186 | -0.198 | 0.055 | exams | intro     | biol | active  | 73  | Cotner & Ballen, 2018         | intro biol                            | university of minnesota             |
| 187 | -0.433 | 0.026 | exams | intro     | biol | active  | 160 | Cotner & Ballen, 2018         | intro biol                            | university of minnesota             |
| 188 | -0.082 | 0.047 | exams | intro     | biol | active  | 115 | Cotner & Ballen, 2018         | intro biol                            | university of minnesota             |
| 189 | -0.087 | 0.03  | exams | intro     | biol | active  | 139 | Cotner & Ballen, 2018         | intro biol                            | university of minnesota             |
| 190 | -0.453 | 0.022 | exams | intro     | biol | active  | 199 | Cotner & Ballen, 2018         | intro biol                            | university of minnesota             |
| 191 | 0.125  | 0.045 | exams | intro     | biol | active  | 99  | Cotner & Ballen, 2018         | intro biol                            | university of minnesota             |
| 192 | -0.443 | 0.032 | exams | intro     | biol | active  | 129 | Cotner & Ballen, 2018         | intro biol                            | university of minnesota             |
| 193 | -0.68  | 0.056 | exams | non-intro | biol | lecture | 78  | Cotner & Ballen, 2018         | Evolution                             | university of minnesota             |
| 194 | -0.018 | 0.048 | exams | non-intro | biol | lecture | 86  | Cotner & Ballen, 2018         | Evolution                             | university of minnesota             |
| 195 | -0.054 | 0.026 | exams | intro     | biol | active  | 156 | Cotner & Ballen, 2018         | intro biol                            | university of minnesota             |
| 196 | -0.297 | 0.026 | exams | intro     | biol | active  | 154 | Cotner & Ballen, 2018         | intro biol                            | university of minnesota             |
| 197 | -5.865 | 0.087 | exams | non-intro | chem | lecture | 82  | Gross et al., 2015            | physical chem for life science majors | university of massachusetts-amherst |
| 198 | -2.407 | 0.03  | exams | non-intro | chem | active  | 49  | Gross et al., 2015            | physical chem for life science majors | university of massachusetts-amherst |
| 199 | -0.779 | 0.047 | exams | non-intro | chem | NA      | 96  | Bardi et al., 2011            | Organic chem I                        | marshall university                 |
| 200 | -0.347 | 0.045 | exams | intro     | biol | NA      | 190 | Research Coordination Network | biol                                  | new mexico state university         |
| 201 | 0.496  | 0.038 | exams | intro     | biol | NA      | 185 | Research Coordination Network | biol                                  | new mexico state university         |
| 202 | 0.488  | 0.104 | exams | intro     | biol | NA      | 96  | Research Coordination Network | biol                                  | new mexico state university         |
| 203 | 0.729  | 0.098 | exams | intro     | biol | NA      | 93  | Research Coordination Network | biol                                  | new mexico state university         |
| 204 | -4.526 | 0.17  | exams | intro     | biol | active  | NA  | Rhodes, 2013                  | Principles of biol                    | kansas state university             |
| 205 | -5.67  | 0.175 | exams | intro     | biol | active  | NA  | Rhodes, 2013                  | Principles of biol                    | kansas state university             |
| 206 | -4.26  | 0.29  | exams | intro     | biol | active  | NA  | Rhodes, 2013                  | Principles of biol                    | kansas state university             |
| 207 | -4.34  | 0.121 | exams | intro     | biol | active  | NA  | Rhodes, 2013                  | Principles of biol                    | kansas state university             |

|     |        |       |       |       |      |         |     |                       |                            |                          |
|-----|--------|-------|-------|-------|------|---------|-----|-----------------------|----------------------------|--------------------------|
| 208 | 0.594  | 0.075 | exams | intro | chem | NA      | 28  | Niemeyer et al., 2009 | gen chem                   | southwestern university  |
| 209 | 2.221  | 0.053 | exams | intro | biol | active  | 221 | Lax et al., 2017      | intro gen biol             | duquesne university      |
| 210 | -3.114 | 0.058 | exams | intro | biol | active  | 239 | Lax et al., 2017      | intro gen biol             | duquesne university      |
| 211 | -0.317 | 0.005 | exams | intro | biol | active  | 400 | Williams et al., 2016 | intro biol                 | uc irvine                |
| 212 | -0.145 | 0.002 | exams | intro | chem | lecture | 250 | Stanich et al., 2018  | Intro to chem              | university of washington |
| 213 | 0.084  | 0.009 | exams | intro | biol |         | 422 | Eddy et al., 2014     | Ecology and Evolution      | university of washington |
| 214 | -0.138 | 0.009 | exams | intro | biol |         | 431 | Eddy et al., 2014     | Cell Bio and Genetics      | university of washington |
| 215 | -0.263 | 0.015 | exams | intro | biol |         | 281 | Eddy et al., 2014     | Physiology and Development | university of washington |
| 216 | 0.171  | 0.043 | exams | intro | biol |         | 159 | Eddy et al., 2014     | Ecology and Evolution      | university of washington |
| 217 | -0.236 | 0.031 | exams | intro | biol |         | 143 | Eddy et al., 2014     | Cell Bio and Genetics      | university of washington |
| 218 | -0.116 | 0.023 | exams | intro | biol |         | 176 | Eddy et al., 2014     | Physiology and Development | university of washington |
| 219 | -0.288 | 0.006 | exams | intro | biol |         | 678 | Eddy et al., 2014     | Ecology and Evolution      | university of washington |
| 220 | -0.266 | 0.011 | exams | intro | biol |         | 375 | Eddy et al., 2014     | Cell Bio and Genetics      | university of washington |
| 221 | -0.234 | 0.015 | exams | intro | biol |         | 278 | Eddy et al., 2014     | Physiology and Development | university of washington |
| 222 | -0.036 | 0.006 | exams | intro | biol |         | 630 | Eddy et al., 2014     | Ecology and Evolution      | university of washington |

|     |        |       |       |       |      |         |     |                        |                            |                          |
|-----|--------|-------|-------|-------|------|---------|-----|------------------------|----------------------------|--------------------------|
| 223 | -0.298 | 0.01  | exams | intro | biol |         | 424 | Eddy et al., 2014      | Cell Bio and Genetics      | university of washington |
| 224 | -0.022 | 0.009 | exams | intro | biol |         | 456 | Eddy et al., 2014      | Ecology and Evolution      | university of washington |
| 225 | -0.172 | 0.01  | exams | intro | biol |         | 379 | Eddy et al., 2014      | Cell Bio and Genetics      | university of washington |
| 226 | -0.585 | 0.013 | exams | intro | biol |         | 321 | Eddy et al., 2014      | Physiology and Development | university of washington |
| 227 | -0.365 | 0.025 | exams | intro | biol |         | 164 | Eddy et al., 2014      | Ecology and Evolution      | university of washington |
| 228 | -0.184 | 0.021 | exams | intro | biol |         | 188 | Eddy et al., 2014      | Cell Bio and Genetics      | university of washington |
| 229 | -0.253 | 0.026 | exams | intro | biol |         | 167 | Eddy et al., 2014      | Physiology and Development | university of washington |
| 230 | -0.136 | 0.004 | exams | intro | biol |         | 970 | Eddy et al., 2014      | Ecology and Evolution      | university of washington |
| 231 | -0.217 | 0.011 | exams | intro | biol |         | 372 | Eddy et al., 2014      | Cell Bio and Genetics      | university of washington |
| 232 | -0.123 | 0.015 | exams | intro | biol |         | 287 | Eddy et al., 2014      | Physiology and Development | university of washington |
| 233 | -0.212 | 0.007 | exams | intro | biol |         | 614 | Eddy et al., 2014      | Ecology and Evolution      | university of washington |
| 234 | -0.036 | 0.01  | exams | intro | biol |         | 438 | Eddy et al., 2014      | Cell Bio and Genetics      | university of washington |
| 235 | -0.049 | 0.014 | exams | intro | biol |         | 282 | Eddy et al., 2014      | Physiology and Development | university of washington |
| 236 | -0.904 | 0.22  | CI    | intro | biol | lecture | 23  | Rodriguez et al., 2018 | intro biol                 | unknown 1                |

|     |        |       |    |       |      |         |    |                            |                                    |                          |
|-----|--------|-------|----|-------|------|---------|----|----------------------------|------------------------------------|--------------------------|
| 237 | -0.564 | 0.28  | CI | intro | biol | active  | 21 | Rodriguez et al., 2018     | intro biol                         | unknown 1                |
| 238 | -0.041 | 0.263 | CI | intro | biol | active  | 23 | Rodriguez et al., 2018     | intro biol                         | unknown 1                |
| 239 | 0.757  | 0.337 | CI | intro | chem | lecture | 21 | Rodriguez et al., 2018     | gen chem                           | unknown 1                |
| 240 | -0.158 | 0.203 | CI | intro | chem | active  | 22 | Rodriguez et al., 2018     | gen chem                           | unknown 1                |
| 241 | -0.374 | 0.33  | CI | intro | chem | active  | 18 | Rodriguez et al., 2018     | gen chem                           | unknown 1                |
| 242 | 0.146  | 0.131 | CI | intro | chem | NA      | NA | Sunny et al., 2017         | intro chem                         | unknown 3                |
| 243 | -0.336 | 0.097 | CI | intro | chem | NA      | NA | Sunny et al., 2017         | intro chem                         | unknown 3                |
| 244 | -0.106 | 0.112 | CI | intro | chem | NA      | NA | Sunny et al., 2017         | intro chem                         | unknown 3                |
| 245 | 0.144  | 0.091 | CI | intro | chem | NA      | NA | Sunny et al., 2017         | intro chem                         | unknown 3                |
| 246 | -0.242 | 0.019 | CI | intro | biol | NA      | NA | Willoughby & Metz,<br>2009 | intro to cell biol and<br>genetics | montana state university |

**Table S2.** Descriptive categories of (A) Institutions and (B) Courses included in the meta-analysis. Categories are defined using the basic classification system within the Carnegie Classification of Institutions of Higher Education ([carnegieclassifications.iu.edu](http://carnegieclassifications.iu.edu)). Institutions and courses are further broken down by whether they are designated as a Minority Serving Institution (MSI) by the United States Department of Education. These institutions of higher education enroll student populations with significant percentages of undergraduate minority students. Note that in some studies, multiple assessment measures (e.g., exam grade, total course grade) were collected from the same course.

| <b>(A) Institutions</b>          | MSI | non-MSI | Unknown | Total institutions |
|----------------------------------|-----|---------|---------|--------------------|
| Associate's Colleges             | 2   | 2       |         | 4                  |
| Baccalaureate Colleges           | 0   | 1       |         | 1                  |
| Doctoral Universities            | 0   | 14      |         | 14                 |
| Master's Colleges & Universities | 2   | 1       |         | 3                  |
| Unknown                          |     |         | 4       | 4                  |
| <b>Total</b>                     | 4   | 18      | 4       | 26                 |

| <b>(B) Courses</b>               | MSI | non-MSI | Unknown | Total courses |
|----------------------------------|-----|---------|---------|---------------|
| Associate's Colleges             | 30  | 45      |         | 75            |
| Baccalaureate Colleges           | 0   | 1       |         | 1             |
| Doctoral Universities            | 0   | 120     |         | 120           |
| Master's Colleges & Universities | 16  | 22      |         | 38            |
| Unknown                          |     |         | 12      | 12            |
| <b>Total</b>                     | 46  | 188     | 12      | 246           |

**Table S3.** Qualitative descriptions of pedagogies. We characterized active learning classes as those that incorporated interactive and student-focused activities into the class structure. We considered lecture classes those in which the majority of class time was dedicated to lecture by the instructor, with few if any alternative activities occurring during a normal class period.

| Author                        | Description                                                                                                                                                                                                                                                  |
|-------------------------------|--------------------------------------------------------------------------------------------------------------------------------------------------------------------------------------------------------------------------------------------------------------|
| <b>Active Learning</b>        |                                                                                                                                                                                                                                                              |
| Williams et al., 2016         | Paper: "conducted in two sections of a large active-learning undergraduate introductory biology class".<br>Qualtrics survey: "Active learning lectures with clickers, demonstrations and small group work. Roughly 15-25 minutes per 50 minutes was active." |
| Research Coordination Network | Two 90-minute classes per week, 60% active learning and 40% lecture on average. Course average determined by: exams-70%, assignments-10%, quizzes-20%. Exams were multiple choice, fill-in-blank, essay, and short answer.                                   |
| Research Coordination Network | A 110 minute lecture twice a week, and a 170 minute lab once a week. Traditional textbook (not OER). The lecture was front loaded with extensive active learning.                                                                                            |
| Research Coordination Network | 110 min lec twice a week, 170 min lab once a week. Traditional textbook (not OER). Lectures were mostly front loaded with extensive active learning.                                                                                                         |
| Research Coordination Network | An Active-learning class, for 75 mins, two times per week, and a 2-hour lab each week.                                                                                                                                                                       |
| Research Coordination Network | An Active-learning class, for 75 mins, two times per week, and a 2-hour lab each week.                                                                                                                                                                       |
| Research Coordination Network | An Active-learning class, for 75 mins, two times per week, and a 2-hour lab each week.                                                                                                                                                                       |
| Research Coordination Network | An Active-learning class, for 75 mins, two times per week, and a 2-hour lab each week.                                                                                                                                                                       |
| Research Coordination Network | An Active-learning class, for 75 mins, two times per week, and a 2-hour lab each week.                                                                                                                                                                       |
| Research Coordination Network | An Active-learning class, for 75 mins, two times per week, and a 2-hour lab each week.                                                                                                                                                                       |
| Research Coordination Network | An Active-learning class, for 75 mins, two times per week, and a 2-hour lab each week.                                                                                                                                                                       |
| Research Coordination Network | An Active-learning class, for 75 mins, two times per week, and a 2-hour lab each week.                                                                                                                                                                       |
| Research Coordination Network | An Active-learning class, for 75 mins, two times per week, and a 2-hour lab each week.                                                                                                                                                                       |
| Research Coordination Network | An Active-learning class, for 75 mins, two times per week, and a 2-hour lab each week.                                                                                                                                                                       |
| Research Coordination Network | An Active-learning class, for 75 mins, two times per week, and a 2-hour lab each week.                                                                                                                                                                       |
| Research Coordination Network | An Active-learning class, for 75 mins, two times per week, and a 2-hour lab each week.                                                                                                                                                                       |
| Research Coordination Network | An Active-learning class, for 75 mins, two times per week, and a 2-hour lab each week.                                                                                                                                                                       |
| Research Coordination Network | An Active-learning class, for 75 mins, two times per week, and a 2-hour lab each week.                                                                                                                                                                       |
| Research Coordination Network | An Active-learning class, for 75 mins, two times per week, and a 2-hour lab each week.                                                                                                                                                                       |
| Research Coordination Network | An Active-learning class, for 75 mins, two times per week, and a 2-hour lab each week.                                                                                                                                                                       |
| Research Coordination Network | A Monday mini-lecture with iClicker questions and writing prompts, Wednesday                                                                                                                                                                                 |



|                        |                                                                                                                                                                                                                                                                                                                                                                                                                                                                                                                                                                                                                                                                                                                                                                                                                                                                                                                                                                                                                                                                                                                                       |
|------------------------|---------------------------------------------------------------------------------------------------------------------------------------------------------------------------------------------------------------------------------------------------------------------------------------------------------------------------------------------------------------------------------------------------------------------------------------------------------------------------------------------------------------------------------------------------------------------------------------------------------------------------------------------------------------------------------------------------------------------------------------------------------------------------------------------------------------------------------------------------------------------------------------------------------------------------------------------------------------------------------------------------------------------------------------------------------------------------------------------------------------------------------------|
| Network                | group activity with HOCS and iClicker questions, Friday student-led mini-review, formative assessment quiz.                                                                                                                                                                                                                                                                                                                                                                                                                                                                                                                                                                                                                                                                                                                                                                                                                                                                                                                                                                                                                           |
| Rodriguez et al., 2018 | <p>Project-based learning allows students to work on complex problems and provides authentic experiences in order for students to find purposeful meaning to STEM concepts. Capraro (2013) defines project-based learning as a teaching strategy that requires students to think critically and analytically, enhancing their higher-order thinking skills. Project-based learning involves students seeking a solution to complex problems situated within larger projects and justifying their results. Railsback (2002) also stated that project-based learning moves away from memorization and provides complex work that contains interdisciplinary disciplines and encourages cooperative learning. Project-based teaching strategies are a holistic method that is becoming more meaningful to students, especially those who have different learning styles, backgrounds, and abilities in which students are able to explore within the curriculum. [from intro--methods discuss that instructors underwent training related to the types of teaching, and syllabi were approved, but did not give any more specifics.]</p> |
| Rodriguez et al., 2018 | <p>Peer-led instruction involves breaking large lectures into smaller workshop sections in which peer instructors facilitate cooperative group work, thus increasing student interaction...Watkins and Mazur (2013) stated that by incorporating and structuring peer discussions, students have more opportunities to get to share ideas and form a collaborative discussion within the introductory science classroom. During these discussions, the instructor is able to listen to the students and students are able to engage more in the lecture, which increases the faculty-student interaction. PI creates a more exciting classroom and a positive environment is seen between faculty member and students. These constant interactions and feedback, as seen in PI courses, allows an instructor to see the weaknesses of the students which will allow him or her to better tailor their instruction according to the students' needs. [from intro--methods discuss that instructors underwent training related to the types of teaching, and syllabi were approved, but did not give any more specifics]</p>            |
| Rodriguez et al., 2018 | <p>Project-based learning allows students to work on complex problems and provides authentic experiences in order for students to find purposeful meaning to STEM concepts. Capraro (2013) defines project-based learning as a teaching strategy that requires students to think critically and analytically, enhancing their higher-order thinking skills. Project-based learning involves students seeking a solution to complex problems situated within larger projects and justifying their results. Railsback (2002) also stated that project-based learning moves away from memorization and provides complex work that contains interdisciplinary disciplines and encourages cooperative learning. Project-based teaching strategies are a holistic method that is becoming more meaningful to students, especially those who have different learning styles, backgrounds, and abilities in which students are able to explore within the curriculum. [from intro--methods discuss that instructors underwent training related to the types of teaching, and syllabi were approved, but did not give any more specifics]</p>  |
| Rodriguez et al., 2018 | <p>Peerled instruction involves breaking large lectures into smaller workshop sections in which peer instructors facilitate cooperative group work, thus increasing student interaction...Watkins and Mazur (2013) stated that by incorporating and structuring peer discussions, students have more opportunities to get to share ideas and form a collaborative discussion within the introductory science classroom. During these discussions, the instructor is able to listen to the students and</p>                                                                                                                                                                                                                                                                                                                                                                                                                                                                                                                                                                                                                            |

|                       |                                                                                                                                                                                                                                                                                                                                                                                                                                                                                                                                                                                                                                                                                                                                                                                                                                                                                                                                                                                                                           |
|-----------------------|---------------------------------------------------------------------------------------------------------------------------------------------------------------------------------------------------------------------------------------------------------------------------------------------------------------------------------------------------------------------------------------------------------------------------------------------------------------------------------------------------------------------------------------------------------------------------------------------------------------------------------------------------------------------------------------------------------------------------------------------------------------------------------------------------------------------------------------------------------------------------------------------------------------------------------------------------------------------------------------------------------------------------|
|                       | <p>students are able to engage more in the lecture, which increase the faculty-student interaction. PI creates a more exciting classroom and a positive environment is seen between faculty member and students. These constant interactions and feedback, as seen in PI courses, allows an instructor to see the weaknesses of the students which will allow him or her to better tailor their instruction according to the students' needs. [from intro--methods discuss that instructors underwent training related to the types of teaching, and syllabi were approved, but did not give any more specifics]</p>                                                                                                                                                                                                                                                                                                                                                                                                      |
| Cotner & Ballen, 2018 | lecture+interactive elements                                                                                                                                                                                                                                                                                                                                                                                                                                                                                                                                                                                                                                                                                                                                                                                                                                                                                                                                                                                              |
| Cotner & Ballen, 2018 | lecture+interactive elements                                                                                                                                                                                                                                                                                                                                                                                                                                                                                                                                                                                                                                                                                                                                                                                                                                                                                                                                                                                              |
| Cotner & Ballen, 2018 | lecture+interactive elements                                                                                                                                                                                                                                                                                                                                                                                                                                                                                                                                                                                                                                                                                                                                                                                                                                                                                                                                                                                              |
| Cotner & Ballen, 2018 | lecture+interactive elements                                                                                                                                                                                                                                                                                                                                                                                                                                                                                                                                                                                                                                                                                                                                                                                                                                                                                                                                                                                              |
| Cotner & Ballen, 2018 | lecture+interactive elements                                                                                                                                                                                                                                                                                                                                                                                                                                                                                                                                                                                                                                                                                                                                                                                                                                                                                                                                                                                              |
| Cotner & Ballen, 2018 | lecture+interactive elements                                                                                                                                                                                                                                                                                                                                                                                                                                                                                                                                                                                                                                                                                                                                                                                                                                                                                                                                                                                              |
| Cotner & Ballen, 2018 | lecture+interactive elements                                                                                                                                                                                                                                                                                                                                                                                                                                                                                                                                                                                                                                                                                                                                                                                                                                                                                                                                                                                              |
| Cotner & Ballen, 2018 | lecture+interactive elements                                                                                                                                                                                                                                                                                                                                                                                                                                                                                                                                                                                                                                                                                                                                                                                                                                                                                                                                                                                              |
| Cotner & Ballen, 2018 | lecture+interactive elements                                                                                                                                                                                                                                                                                                                                                                                                                                                                                                                                                                                                                                                                                                                                                                                                                                                                                                                                                                                              |
| Cotner & Ballen, 2018 | lecture+interactive elements                                                                                                                                                                                                                                                                                                                                                                                                                                                                                                                                                                                                                                                                                                                                                                                                                                                                                                                                                                                              |
| Cotner & Ballen, 2018 | lecture+interactive elements                                                                                                                                                                                                                                                                                                                                                                                                                                                                                                                                                                                                                                                                                                                                                                                                                                                                                                                                                                                              |
| Cotner & Ballen, 2018 | lecture+interactive elements                                                                                                                                                                                                                                                                                                                                                                                                                                                                                                                                                                                                                                                                                                                                                                                                                                                                                                                                                                                              |
| Cotner & Ballen, 2018 | lecture+interactive elements                                                                                                                                                                                                                                                                                                                                                                                                                                                                                                                                                                                                                                                                                                                                                                                                                                                                                                                                                                                              |
| Rhodes, 2013          | <p>Offered in a studio format. This format combines lecture and laboratory activities. Students work in groups of four and work through exercises as guided by a laboratory manual and a course website. Every course section is led by two full-time faculty instructors and two graduate teaching assistants; student to instructor ratio is 20:1. Over the course of a semester, seven main topics are covered: introduction to science, ecology, cell biology, genetics, energetics, plant biology, and animal biology. Students' grades are determined by performance on biweekly quizzes and seven unit exams.</p>                                                                                                                                                                                                                                                                                                                                                                                                  |
| Rhodes, 2013          | <p>Offered in a studio format. This format combines lecture and laboratory activities. Students work in groups of four and work through exercises as guided by a laboratory manual and a course website. Every course section is led by two full-time faculty instructors and two graduate teaching assistants; student to instructor ratio is 20:1. Over the course of a semester, seven main topics are covered: introduction to science, ecology, cell biology, genetics, energetics, plant biology, and animal biology. Students' grades are determined by performance on biweekly quizzes and seven unit exams...[+multimedia module] development of the first multimedia module ensued using the principles outlined for multimedia development by Mayer (2001, 2009). Special attention was given to Mayer's (2001, 2009) principles for reducing extraneous processing and managing essential processing...[animation+narration available through course website (looks to be the equivalent of AU's Canvas)]</p> |
| Rhodes, 2013          | <p>Offered in a studio format. This format combines lecture and laboratory activities. Students work in groups of four and work through exercises as guided by a laboratory manual and a course website. Every course section is led by two full-time faculty instructors and two graduate teaching assistants; student to instructor ratio is 20:1. Over the course of a semester, seven main topics are covered: introduction to</p>                                                                                                                                                                                                                                                                                                                                                                                                                                                                                                                                                                                    |

|                    |                                                                                                                                                                                                                                                                                                                                                                                                                                                                                                                                                                                                                                                                                                                                                                                                                                                                                                                                                                                                                                                                                                                                                                                                                                                                                                                                                                                                                                                                                                                                                                                                                                                                                                                                                                                                                 |
|--------------------|-----------------------------------------------------------------------------------------------------------------------------------------------------------------------------------------------------------------------------------------------------------------------------------------------------------------------------------------------------------------------------------------------------------------------------------------------------------------------------------------------------------------------------------------------------------------------------------------------------------------------------------------------------------------------------------------------------------------------------------------------------------------------------------------------------------------------------------------------------------------------------------------------------------------------------------------------------------------------------------------------------------------------------------------------------------------------------------------------------------------------------------------------------------------------------------------------------------------------------------------------------------------------------------------------------------------------------------------------------------------------------------------------------------------------------------------------------------------------------------------------------------------------------------------------------------------------------------------------------------------------------------------------------------------------------------------------------------------------------------------------------------------------------------------------------------------|
|                    | <p>science, ecology, cell biology, genetics, energetics, plant biology, and animal biology. Students' grades are determined by performance on biweekly quizzes and seven unit exams...[+multimedia module] development of the first multimedia module ensued using the principles outlined for multimedia development by Mayer (2001, 2009). Special attention was given to Mayer's (2001, 2009) principles for reducing extraneous processing and managing essential processing...[animation+narration available through course website (looks to be the equivalent of AU's Canvas)...[module adjusted based on feedback from the prior semester]</p>                                                                                                                                                                                                                                                                                                                                                                                                                                                                                                                                                                                                                                                                                                                                                                                                                                                                                                                                                                                                                                                                                                                                                          |
| Rhodes, 2013       | <p>Offered in a studio format. This format combines lecture and laboratory activities. Students work in groups of four and work through exercises as guided by a laboratory manual and a course website. Every course section is led by two full-time faculty instructors and two graduate teaching assistants; student to instructor ratio is 20:1. Over the course of a semester, seven main topics are covered: introduction to science, ecology, cell biology, genetics, energetics, plant biology, and animal biology. Students' grades are determined by performance on biweekly quizzes and seven unit exams...[+multimedia module] development of the first multimedia module ensued using the principles outlined for multimedia development by Mayer (2001, 2009). Special attention was given to Mayer's (2001, 2009) principles for reducing extraneous processing and managing essential processing...[animation+narration available through course website (looks to be the equivalent of AU's Canvas)...[module adjusted based on feedback from the prior semester]"</p>                                                                                                                                                                                                                                                                                                                                                                                                                                                                                                                                                                                                                                                                                                                         |
| Gross et al., 2015 | <p>Example problems solved in class by the instructor in the standard course were adapted for peer-peer activities in the flipped-format course...The flipped-format course met either for one 75-min session per week or for two 50-min sessions per week. This reduced in-class time was supplemented with prerecorded "lectures" available to the students at least a week before class, which increased the online component in the flipped course compared with the standard course. These supplemental lectures were broken into 5- to 20-min chunks on specific topics in the OWLBook. Students were free to view the supplemental lectures or to skip them, as these lectures carried no course credit. The use of less in-class time allowed the instructor to offer more sections of the course, which allowed the class size to remain about constant despite a rapidly increasing total number of students taking the course. All other components of the standard course were present in the flipped course. Aside from the prerecorded lectures and reduced in-class time for the flipped-format course, a substantial difference between course formats was the increased use of active learning in the flipped classroom. This took the form of peer-peer think-pair-share activities, clicker responses, and example problems for students to work in the once-weekly 75-min sections. In the twice-weekly 50-min sessions, team-based learning (Michaelsen et al., 2004) was used. In this format, teams of five to eight students remained allied throughout the semester. In-class activities included difficult example problems attacked by teams, individual and team readiness assessments on new material, and student explanations of problem solutions on projected whiteboards.</p> |
| Auburn U. dataset  | Active                                                                                                                                                                                                                                                                                                                                                                                                                                                                                                                                                                                                                                                                                                                                                                                                                                                                                                                                                                                                                                                                                                                                                                                                                                                                                                                                                                                                                                                                                                                                                                                                                                                                                                                                                                                                          |

|                               |                                                                                                                                                                                                                                                                                                                                                                                                                                                                                                                                                                                                                                                                                                                                                                                                                                                                                                                                                                                                                                                                                                                                                                                                                                                                                                                                                                                                                                                                                                                                       |
|-------------------------------|---------------------------------------------------------------------------------------------------------------------------------------------------------------------------------------------------------------------------------------------------------------------------------------------------------------------------------------------------------------------------------------------------------------------------------------------------------------------------------------------------------------------------------------------------------------------------------------------------------------------------------------------------------------------------------------------------------------------------------------------------------------------------------------------------------------------------------------------------------------------------------------------------------------------------------------------------------------------------------------------------------------------------------------------------------------------------------------------------------------------------------------------------------------------------------------------------------------------------------------------------------------------------------------------------------------------------------------------------------------------------------------------------------------------------------------------------------------------------------------------------------------------------------------|
| Auburn U. dataset             | Active                                                                                                                                                                                                                                                                                                                                                                                                                                                                                                                                                                                                                                                                                                                                                                                                                                                                                                                                                                                                                                                                                                                                                                                                                                                                                                                                                                                                                                                                                                                                |
| Auburn U. dataset             | Active-learning. Students were assigned into groups for each of the four different exams. Each class period the students completed a worksheet based on the days lessons. The worksheets were collected at the end of each period. A third were graded, a third were given participation points, and a third I selected 1 paper from the groups to grade. The student groups were reshuffled for each exam section. The exams were a third short answer and remaining multiple choice. The final was 100% multiple choice                                                                                                                                                                                                                                                                                                                                                                                                                                                                                                                                                                                                                                                                                                                                                                                                                                                                                                                                                                                                             |
| Lax et al., 2017              | Students in the partial flip group watched a 16-min lecture that was recorded by the instructor demonstrating the Meselson and Stahl experiment. Following the recording, students answered the same two multiple-choice questions as the control group along with a ‘password’ question, the answer to which was embedded in the recorded lecture. The password question was used to ensure that students actually watched the recorded lecture prior to class...For the partial flip group, students worked on a group worksheet for 20 min. This worksheet challenged students to recreate the experiment and determine conclusions based on hypothetical situations and results. During the worksheet component of the lesson, four individuals (two course instructors plus two graduate-level teaching assistants) walked around the room to aid students. To facilitate discussion between staff and students, four rows in the auditorium-style classroom were left empty to act as aisles for the staff. At the end of the worksheet, the students were given three PRS questions. Students without remotes were asked to provide answers on 3 × 5 cards...Following class, for both groups, students completed an online assignment that covered the Meselson and Stahl experiment...The partial flip group completed the two ‘novel’ questions only...in the partial flip section, both the students and professor spent approximately 75% of class time in active learning/teaching (Figure 1) (see page 6 for copus pie) |
| Stanich et al., 2018          | Active Learning                                                                                                                                                                                                                                                                                                                                                                                                                                                                                                                                                                                                                                                                                                                                                                                                                                                                                                                                                                                                                                                                                                                                                                                                                                                                                                                                                                                                                                                                                                                       |
| Research Coordination Network | Three 60-minute classes per week, approximately 60% lecture and 40% in-class case studies, activities, & discussions. Course average determined by: 56% exams, 21% quizzes, and 23% homework. Exams were about 2/3 multiple choice and 1/3 written-response/short answer.                                                                                                                                                                                                                                                                                                                                                                                                                                                                                                                                                                                                                                                                                                                                                                                                                                                                                                                                                                                                                                                                                                                                                                                                                                                             |
| Research Coordination Network | A 110 minute lecture twice a week, and a 170 minute lab once a week. Traditional textbook (not OER). Lectures were mostly traditional with limited active learning.                                                                                                                                                                                                                                                                                                                                                                                                                                                                                                                                                                                                                                                                                                                                                                                                                                                                                                                                                                                                                                                                                                                                                                                                                                                                                                                                                                   |
| Research Coordination Network | A 110 minute lecture twice a week, and a 170 min lab once a week. Traditional textbook (not OER). Lectures were mostly traditional with limited active learning incorporated.                                                                                                                                                                                                                                                                                                                                                                                                                                                                                                                                                                                                                                                                                                                                                                                                                                                                                                                                                                                                                                                                                                                                                                                                                                                                                                                                                         |
| Research Coordination Network | A 110 minute lecture twice a week, and a 170 min lab once a week. Traditional textbook (not OER). Lectures were mostly traditional with limited active learning incorporated.                                                                                                                                                                                                                                                                                                                                                                                                                                                                                                                                                                                                                                                                                                                                                                                                                                                                                                                                                                                                                                                                                                                                                                                                                                                                                                                                                         |
| Research Coordination Network | A 110 minute lecture twice a week, and a 170 min lab once a week. Traditional textbook (not OER). Lectures were mostly traditional with limited active learning incorporated.                                                                                                                                                                                                                                                                                                                                                                                                                                                                                                                                                                                                                                                                                                                                                                                                                                                                                                                                                                                                                                                                                                                                                                                                                                                                                                                                                         |

|                               |                                                                                                                                                                                                                                                                                                                                                                                                                                                                                                                                                                                                                                                                                                                                                                                                                                                                                                                                                                                                                                                                                                                                                                                                                                                                                                                         |
|-------------------------------|-------------------------------------------------------------------------------------------------------------------------------------------------------------------------------------------------------------------------------------------------------------------------------------------------------------------------------------------------------------------------------------------------------------------------------------------------------------------------------------------------------------------------------------------------------------------------------------------------------------------------------------------------------------------------------------------------------------------------------------------------------------------------------------------------------------------------------------------------------------------------------------------------------------------------------------------------------------------------------------------------------------------------------------------------------------------------------------------------------------------------------------------------------------------------------------------------------------------------------------------------------------------------------------------------------------------------|
| Research Coordination Network | A 110 minute lecture twice a week, and a 170 minute lab once a week. Traditional textbook (not OER). Lectures were mostly traditional with active learning incorporated.                                                                                                                                                                                                                                                                                                                                                                                                                                                                                                                                                                                                                                                                                                                                                                                                                                                                                                                                                                                                                                                                                                                                                |
| Research Coordination Network | A 80 minute lecture twice a week and a 170 min lab once a week. Traditional textbook (not OER). Lectures were mostly traditional with active learning incorporated.                                                                                                                                                                                                                                                                                                                                                                                                                                                                                                                                                                                                                                                                                                                                                                                                                                                                                                                                                                                                                                                                                                                                                     |
| Research Coordination Network | A 110 minute lecture twice a week and a 170 min lab once a week. Traditional textbook (not OER). Lectures were mostly traditional with active learning incorporated.                                                                                                                                                                                                                                                                                                                                                                                                                                                                                                                                                                                                                                                                                                                                                                                                                                                                                                                                                                                                                                                                                                                                                    |
| Research Coordination Network | A 70 minute lecture twice a week and a 170 min lab once a week. Traditional textbook (not OER). Lectures were mostly traditional with active learning incorporated.                                                                                                                                                                                                                                                                                                                                                                                                                                                                                                                                                                                                                                                                                                                                                                                                                                                                                                                                                                                                                                                                                                                                                     |
| Research Coordination Network | A 70 minute lecture twice a week and a 170 min lab once a week. Traditional textbook (not OER). Lectures were mostly traditional with active learning incorporated.                                                                                                                                                                                                                                                                                                                                                                                                                                                                                                                                                                                                                                                                                                                                                                                                                                                                                                                                                                                                                                                                                                                                                     |
| Research Coordination Network | A 70 minute lecture twice a week and a 170 min lab once a week. Traditional textbook (not OER). Lectures were mostly traditional with active learning incorporated.                                                                                                                                                                                                                                                                                                                                                                                                                                                                                                                                                                                                                                                                                                                                                                                                                                                                                                                                                                                                                                                                                                                                                     |
| Research Coordination Network | A 70 minute lecture twice a week and a 170 min lab once a week. Traditional textbook (not OER). Lectures were mostly traditional with active learning incorporated.                                                                                                                                                                                                                                                                                                                                                                                                                                                                                                                                                                                                                                                                                                                                                                                                                                                                                                                                                                                                                                                                                                                                                     |
| Research Coordination Network | A 70 minute lecture twice a week and a 170 min lab once a week. Traditional textbook (not OER). Lectures were mostly traditional with active learning incorporated.                                                                                                                                                                                                                                                                                                                                                                                                                                                                                                                                                                                                                                                                                                                                                                                                                                                                                                                                                                                                                                                                                                                                                     |
| Research Coordination Network | A 70 minute lecture twice a week and a 170 min lab once a week. Traditional textbook (not OER). Lectures were mostly traditional with active learning incorporated.                                                                                                                                                                                                                                                                                                                                                                                                                                                                                                                                                                                                                                                                                                                                                                                                                                                                                                                                                                                                                                                                                                                                                     |
| Research Coordination Network | A 70 minute lecture twice a week and a 170 min lab once a week. Traditional textbook (not OER). Lectures were mostly traditional with active learning incorporated.                                                                                                                                                                                                                                                                                                                                                                                                                                                                                                                                                                                                                                                                                                                                                                                                                                                                                                                                                                                                                                                                                                                                                     |
| Auburn U. dataset             | Active                                                                                                                                                                                                                                                                                                                                                                                                                                                                                                                                                                                                                                                                                                                                                                                                                                                                                                                                                                                                                                                                                                                                                                                                                                                                                                                  |
| Bolt, 2009                    | <p>Ten to fifteen minutes of class time were classified as conforming exclusively to one of three types of material delivery. The three classifications were labeled as either traditional lecture,; technology-enhanced, or; web-enhanced...Although several teaching styles (and combinations of styles) are routinely employed, the focus of this study was to identify 10-15 periods of lecture time that had a clearly describable type of teaching, either traditional lecture (TL), technology-enhanced lecture (TE) and problem based, Web-enhanced learning, (WEB). Traditional lecture was defined as only the teacher coupled with a whiteboard, willing to interact with the students and respond to questions. Technology-enhanced was defined as the teacher coupled with projector, slides and various forms of multimedia, typically projected onto one of two large screens in the front of the lecture hall. In technology enhanced the instructor was willing to interact with students and respond to questions. Web-enhanced was defined as students presented with a problem and using Web resources to find solutions. The instructor was willing to interact with the class during the Web enhanced sessions but students were encouraged to search out solutions and answers on their own.</p> |

|                               |                                                                                                                                                                                                                                                                                                                                                                                                                                                                                                                                                                                                                                                                                                                                                                                                                                                                                                                                                                                                                       |
|-------------------------------|-----------------------------------------------------------------------------------------------------------------------------------------------------------------------------------------------------------------------------------------------------------------------------------------------------------------------------------------------------------------------------------------------------------------------------------------------------------------------------------------------------------------------------------------------------------------------------------------------------------------------------------------------------------------------------------------------------------------------------------------------------------------------------------------------------------------------------------------------------------------------------------------------------------------------------------------------------------------------------------------------------------------------|
|                               | <p>It is important to note that during all types of instruction the teacher would respond to questions and interact with the class...[one class, so presumably alternated] Students were required to purchase I-clickers... Students were taught material throughout the course of the semester and after 10-15 minutes of instructional time knowledge questions were posed to the class to assess the relative level of understanding. Students responded with the ARS (IClickers) a system that allows for anonymous submission of answers, used for several purposes but most notably as a teaching tool to increase student engagement.</p>                                                                                                                                                                                                                                                                                                                                                                      |
| Lax et al., 2017              | <p>The control group received the same content from the recorded lecture in a live lecture format from the course instructor (lecture time 20 min). At the end of the lecture, the students were given two questions, answered using personal response system (PRS) remotes (Turning Point Technologies). Students without remotes were asked to provide answers on 3 × 5 cards. Students received participation credit for answering the questions...Following class, for both groups, students completed an online assignment that covered the Meselson and Stahl experiment. The control group completed identical questions to the partial flip group's in-class worksheet plus an additional two 'novel' questions... Using COPUS, we found that both the instructor and students in the control section spent only about 50% of class time involved in active learning/teaching activities (Student: Ind, AnQ, SQ, Prd, OG, CG, WG; Instructor: DV, AnQ, FUp, MG, IoI, CQ, PQ). (see page 6 for COPUS pie).</p> |
| <b>Lecture-based</b>          |                                                                                                                                                                                                                                                                                                                                                                                                                                                                                                                                                                                                                                                                                                                                                                                                                                                                                                                                                                                                                       |
| Research Coordination Network | Two 70 minute lectures, One 50 minute discussion section.                                                                                                                                                                                                                                                                                                                                                                                                                                                                                                                                                                                                                                                                                                                                                                                                                                                                                                                                                             |
| Research Coordination Network | Two 50 minute lectures, One 75 minute peer lead workshop.                                                                                                                                                                                                                                                                                                                                                                                                                                                                                                                                                                                                                                                                                                                                                                                                                                                                                                                                                             |
| Research Coordination Network | Two 50 minute lectures, One 75 minute peer lead workshop.                                                                                                                                                                                                                                                                                                                                                                                                                                                                                                                                                                                                                                                                                                                                                                                                                                                                                                                                                             |
| Research Coordination Network | Two 50 minute lectures, One 75 minute peer lead workshop.                                                                                                                                                                                                                                                                                                                                                                                                                                                                                                                                                                                                                                                                                                                                                                                                                                                                                                                                                             |
| Research Coordination Network | Two 75-minute lectures per week.                                                                                                                                                                                                                                                                                                                                                                                                                                                                                                                                                                                                                                                                                                                                                                                                                                                                                                                                                                                      |
| Research Coordination Network | Two 75-minute lectures per week.                                                                                                                                                                                                                                                                                                                                                                                                                                                                                                                                                                                                                                                                                                                                                                                                                                                                                                                                                                                      |
| Research Coordination Network | Two 50 minute lectures, One 75 minute peer lead workshop.                                                                                                                                                                                                                                                                                                                                                                                                                                                                                                                                                                                                                                                                                                                                                                                                                                                                                                                                                             |
| Research Coordination Network | Two 50 minute lectures, One 75 minute peer lead workshop.                                                                                                                                                                                                                                                                                                                                                                                                                                                                                                                                                                                                                                                                                                                                                                                                                                                                                                                                                             |
| Research Coordination Network | Two 50 minute lectures, One 75 minute peer lead workshop.                                                                                                                                                                                                                                                                                                                                                                                                                                                                                                                                                                                                                                                                                                                                                                                                                                                                                                                                                             |
| Research Coordination Network | Two 75-minute lectures per week.                                                                                                                                                                                                                                                                                                                                                                                                                                                                                                                                                                                                                                                                                                                                                                                                                                                                                                                                                                                      |
| Research Coordination Network | Three 60-minute classes per week, primarily lecture-based. Course average determined by: 75% exams, 20% quizzes/homework, and 5% participation. Exams were mostly multiple choice with some fill-in-blank, essay, and short answer questions.                                                                                                                                                                                                                                                                                                                                                                                                                                                                                                                                                                                                                                                                                                                                                                         |
| Research Coordination Network | A 110 minute lecture twice a week, and a 170 minute lab once a week. Traditional textbook (not OER). Lectures were mostly traditional.                                                                                                                                                                                                                                                                                                                                                                                                                                                                                                                                                                                                                                                                                                                                                                                                                                                                                |
| Research Coordination Network | A 110 minute lecture twice a week, and a 170 min lab once a week. Traditional textbook (not OER). Lectures were mostly traditional.                                                                                                                                                                                                                                                                                                                                                                                                                                                                                                                                                                                                                                                                                                                                                                                                                                                                                   |
| Research Coordination Network | A 110 minute lecture twice a week, and a 170 min lab once a week. Traditional textbook (not OER). Lectures were mostly traditional.                                                                                                                                                                                                                                                                                                                                                                                                                                                                                                                                                                                                                                                                                                                                                                                                                                                                                   |

|                               |                                                                                                                                                                                                                                                                                                                                                                                                                                                                                                                                                                                                                                                                                                                                                                                                                                                                                                                                                                                                                                                                                                                                                                                                                                                                                                                                                                                                                                                                                                                                                                                                                                                                                                                                   |
|-------------------------------|-----------------------------------------------------------------------------------------------------------------------------------------------------------------------------------------------------------------------------------------------------------------------------------------------------------------------------------------------------------------------------------------------------------------------------------------------------------------------------------------------------------------------------------------------------------------------------------------------------------------------------------------------------------------------------------------------------------------------------------------------------------------------------------------------------------------------------------------------------------------------------------------------------------------------------------------------------------------------------------------------------------------------------------------------------------------------------------------------------------------------------------------------------------------------------------------------------------------------------------------------------------------------------------------------------------------------------------------------------------------------------------------------------------------------------------------------------------------------------------------------------------------------------------------------------------------------------------------------------------------------------------------------------------------------------------------------------------------------------------|
| Research Coordination Network | A 70 minute lecture and lab twice a week. Traditional textbook (not OER). Lectures were mostly traditional.                                                                                                                                                                                                                                                                                                                                                                                                                                                                                                                                                                                                                                                                                                                                                                                                                                                                                                                                                                                                                                                                                                                                                                                                                                                                                                                                                                                                                                                                                                                                                                                                                       |
| Research Coordination Network | A 70 minute lecture and lab twice a week. Traditional textbook (not OER). Lectures were mostly traditional.                                                                                                                                                                                                                                                                                                                                                                                                                                                                                                                                                                                                                                                                                                                                                                                                                                                                                                                                                                                                                                                                                                                                                                                                                                                                                                                                                                                                                                                                                                                                                                                                                       |
| Research Coordination Network | A 70 minute lecture and lab twice a week. Traditional textbook (not OER). Lectures were mostly traditional.                                                                                                                                                                                                                                                                                                                                                                                                                                                                                                                                                                                                                                                                                                                                                                                                                                                                                                                                                                                                                                                                                                                                                                                                                                                                                                                                                                                                                                                                                                                                                                                                                       |
| Research Coordination Network | A 110 minute lecture twice a week, and a 170 min lab once a week. Traditional textbook (not OER). Lectures were mostly traditional.                                                                                                                                                                                                                                                                                                                                                                                                                                                                                                                                                                                                                                                                                                                                                                                                                                                                                                                                                                                                                                                                                                                                                                                                                                                                                                                                                                                                                                                                                                                                                                                               |
| Research Coordination Network | A 110 minute lecture twice a week, and a 170 min lab once a week. Traditional textbook (not OER). Lectures were mostly traditional.                                                                                                                                                                                                                                                                                                                                                                                                                                                                                                                                                                                                                                                                                                                                                                                                                                                                                                                                                                                                                                                                                                                                                                                                                                                                                                                                                                                                                                                                                                                                                                                               |
| Research Coordination Network | A 45 min lecture three times a week (Team Taught).                                                                                                                                                                                                                                                                                                                                                                                                                                                                                                                                                                                                                                                                                                                                                                                                                                                                                                                                                                                                                                                                                                                                                                                                                                                                                                                                                                                                                                                                                                                                                                                                                                                                                |
| Rodriguez et al., 2018        | <p>Instructor was introduced to each of the teaching methods; lecture-based, project-based, and peer-led instruction. In this session, the instructors received a formal understanding of the three teaching strategies. On the second session, discussions of the understanding of each of the teaching strategies took place and a checklist was created (by the biology instructor, chemistry instructor, and investigator) which identified the characteristics of each of the teaching strategies. This checklist helped guide the design and activities of each of the sections that the instructors were expected to teach. On the third session, the checklist that was created from the second session was used to drive the design of the activities and assessments for each of the teaching strategies. In this session, the instructors applied the checklist to the activities that they intended to implement throughout the three teaching strategies. During the fourth session, the activities that were discussed throughout the third session were applied to the syllabus of the instructors' course. Each instructor was expected to submit three different syllabi that complemented the three teaching strategies. A final draft of the syllabus needed to be discussed and approved by the biology instructor, chemistry instructor, and investigator one week before classes resumed. In this way, before the fall 2015 semester began, the instructors for BIOL 1306 and CHEM 1311 understood the concepts of the three teachings strategies and also understood to only implement the teaching strategy that was assigned for the class. [no further details given as to what was on the syllabi]</p> |
| Rodriguez et al., 2018        | <p>Instructor was introduced to each of the teaching methods; lecture-based, project-based, and peer-led instruction. In this session, the instructors received a formal understanding of the three teaching strategies. On the second session, discussions of the understanding of each of the teaching strategies took place and a checklist was created (by the biology instructor, chemistry instructor, and investigator) which identified the characteristics of each of the teaching strategies. This checklist helped guide the design and activities of each of the sections that the instructors were expected to teach. On the third session, the checklist that was</p>                                                                                                                                                                                                                                                                                                                                                                                                                                                                                                                                                                                                                                                                                                                                                                                                                                                                                                                                                                                                                                               |

|                                              |                                                                                                                                                                                                                                                                                                                                                                                                                                                                                                                                                                                                                                                                                                                                                                                                                                                                                                                                                                                                                                                      |
|----------------------------------------------|------------------------------------------------------------------------------------------------------------------------------------------------------------------------------------------------------------------------------------------------------------------------------------------------------------------------------------------------------------------------------------------------------------------------------------------------------------------------------------------------------------------------------------------------------------------------------------------------------------------------------------------------------------------------------------------------------------------------------------------------------------------------------------------------------------------------------------------------------------------------------------------------------------------------------------------------------------------------------------------------------------------------------------------------------|
|                                              | <p>created from the second session was used to drive the design of the activities and assessments for each of the teaching strategies. In this session, the instructors applied the checklist to the activities that they intended to implement throughout the three teaching strategies. During the fourth session, the activities that were discussed throughout the third session were applied to the syllabus of the instructors' course. Each instructor was expected to submit three different syllabi that complemented the three teaching strategies. A final draft of the syllabus needed to be discussed and approved by the biology instructor, chemistry instructor, and investigator one week before classes resumed. In this way, before the fall 2015 semester began, the instructors for BIOL 1306 and CHEM 1311 understood the concepts of the three teachings strategies and also understood to only implement the teaching strategy that was assigned for the class. [no further details given as to what was on the syllabi]</p> |
| Cotner & Ballen, 2018                        | lecture                                                                                                                                                                                                                                                                                                                                                                                                                                                                                                                                                                                                                                                                                                                                                                                                                                                                                                                                                                                                                                              |
| Cotner & Ballen, 2018                        | lecture                                                                                                                                                                                                                                                                                                                                                                                                                                                                                                                                                                                                                                                                                                                                                                                                                                                                                                                                                                                                                                              |
| Auburn U. dataset                            | <p>Traditional lecture with 1 or 2 think pair share activities (1/3 graded, 2/3 participation credit). Students had access to "Supplementary Instructor" (SI) an undergrad that has taken the course. The SI provided an extra hour of instruction. There were 4 exams 75% multiple choice and given the choice of 1 of 3 short answer questions per exam. Final was 100% multiple choice. There were no SI instructors available. I did use undergraduate lecture assistants (n = 6) in class to aid small group discussions and answer student questions.</p>                                                                                                                                                                                                                                                                                                                                                                                                                                                                                      |
| Auburn U. dataset                            | Traditional                                                                                                                                                                                                                                                                                                                                                                                                                                                                                                                                                                                                                                                                                                                                                                                                                                                                                                                                                                                                                                          |
| Rauschenberger, Matthew M.; Sweeder, Ryan D. | <p>The instructional model for these courses consists of a single large lecture section (e.g. n ¼ 466 students in fall 2008 for Biochem I), with prerequisites...The course does not contain many of the previously mentioned curricular changes so can provide a good reference for "traditional" instruction. [intro made mention of active learning approaches]... In recent years, some sections of these courses used in-class response pads, or clickers, in the hope of enhancing class participation and learning</p>                                                                                                                                                                                                                                                                                                                                                                                                                                                                                                                        |
| Rauschenberger & Sweeder, 2010               | <p>The instructional model for these courses consists of a single large lecture section (e.g. n ¼ 466 students in fall 2008 for Biochem I), with prerequisites...The course does not contain many of the previously mentioned curricular changes so can provide a good reference for "traditional" instruction. [intro made mention of active learning approaches]... In recent years, some sections of these courses used in-class response pads, or clickers, in the hope of enhancing class participation and learning</p>                                                                                                                                                                                                                                                                                                                                                                                                                                                                                                                        |
| Shibley et al., 2013                         | <p>The course consisted of a two-period lecture and two-period lab each week for a fifteen-week semester.</p>                                                                                                                                                                                                                                                                                                                                                                                                                                                                                                                                                                                                                                                                                                                                                                                                                                                                                                                                        |
| Research Coordination Network                | Hybrid course: One 1-hour lecture, one 2-hour lab, online work                                                                                                                                                                                                                                                                                                                                                                                                                                                                                                                                                                                                                                                                                                                                                                                                                                                                                                                                                                                       |
| Research Coordination Network                | Hybrid course: One 1-hour lecture, one 2-hour lab, online work                                                                                                                                                                                                                                                                                                                                                                                                                                                                                                                                                                                                                                                                                                                                                                                                                                                                                                                                                                                       |
| Research Coordination Network                | Hybrid course: One 1-hour lecture, one 2-hour lab, online work                                                                                                                                                                                                                                                                                                                                                                                                                                                                                                                                                                                                                                                                                                                                                                                                                                                                                                                                                                                       |
| Research Coordination Network                | Hybrid course: One 1-hour lecture, one 2-hour lab, online work                                                                                                                                                                                                                                                                                                                                                                                                                                                                                                                                                                                                                                                                                                                                                                                                                                                                                                                                                                                       |



|                               |                              |
|-------------------------------|------------------------------|
| Research Coordination Network | Two 75-min lectures per week |
| Research Coordination Network | Two 75-min lectures per week |
| Research Coordination Network | Two 75-min lectures per week |

**Table S4.** Across all analyses, we found null results of the overall difference in performance based on gender. (A) full fixed effects model with university and subject as nested random effects and imputed average standard deviation (SD) in place of missing values; (B) full model with high estimated SD in place of missing values; (C) subset analysis excluding studies with missing SD values; (D) subset analysis of only unpublished data; (E) subset analysis of only published data. A notable difference between groups is the Hedges'  $g$  values among the (D) unpublished and (E) published data. While both are nonsignificant, the difference between them is fairly large, ranging from 0.36 to 0.41 difference. We hypothesize this difference is due to the fact that unpublished data were collected from institutions associated with the Equity and Diversity in Undergraduate STEM Research Coordination Network, a network funded by the National Science Foundation with an explicit focus on promoting equitable outcomes in STEM courses. Thus, it may come as little surprise that courses from these collective institutions had a smaller effect size.

| <b>(A) Full dataset</b>      | <b>Hedges' <math>g</math></b> | <b>p-value</b> | <b>Lower 95% CI</b> | <b>Upper 95% CI</b> |
|------------------------------|-------------------------------|----------------|---------------------|---------------------|
| Course prioritized           | -0.2268                       | 0.4119         | -0.7685             | 0.3149              |
| Exams prioritized            | -0.2197                       | 0.4263         | -0.7610             | 0.3216              |
| <b>(B) High estimated SD</b> |                               |                |                     |                     |
| Course prioritized           | -0.2238                       | 0.4173         | -0.7646             | 0.3170              |
| Exams prioritized            | -0.2168                       | 0.4317         | -0.7573             | 0.3236              |
| <b>(C) No imputed SD</b>     |                               |                |                     |                     |
| Course prioritized           | -0.2222                       | 0.4731         | -0.8294             | 0.3849              |
| Exams prioritized            | -0.2157                       | 0.4861         | -0.8227             | 0.3912              |
| <b>(D) Unpublished data</b>  |                               |                |                     |                     |
| Course prioritized           | 0.0614                        | 0.4854         | -0.1111             | 0.2399              |
| Exams prioritized            | 0.0138                        | 0.8295         | -0.1116             | 0.1392              |
| <b>(E) Published data</b>    |                               |                |                     |                     |
| Course prioritized           | -0.3436                       | 0.4014         | -0.1.1464           | 0.4591              |
| Exams prioritized            | -0.3486                       | 0.3946         | -1.1511             | 0.4539              |

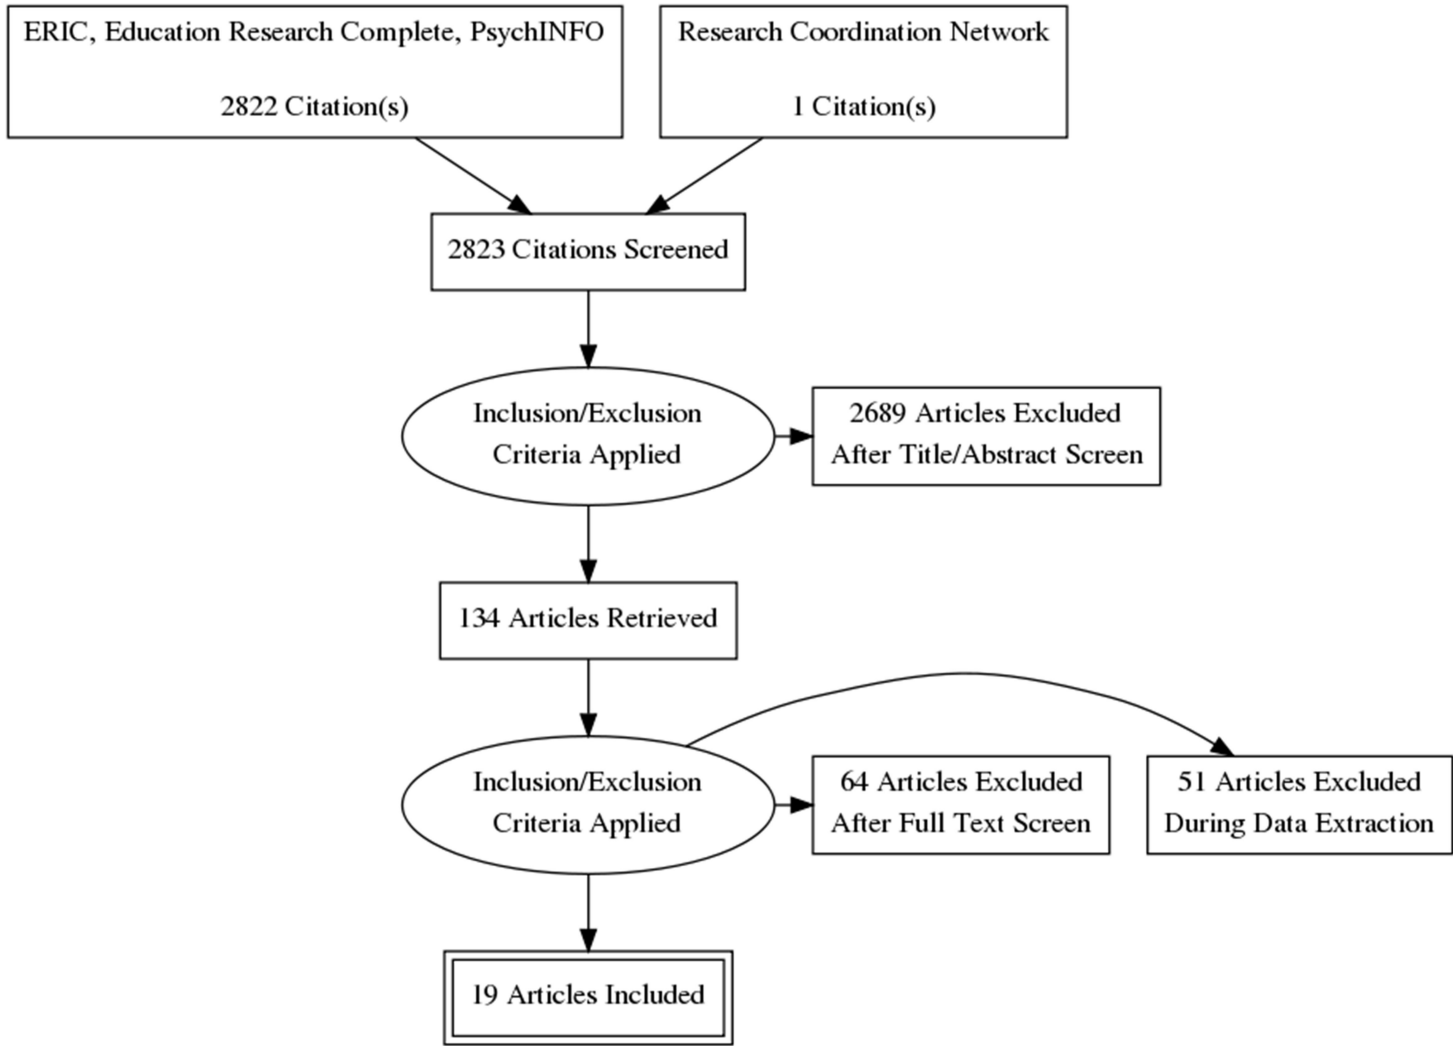

**Figure S1.** PRISMA flow diagram of data collection. Figure generated using the PRISMA flow diagram generator from [prisma.thetacollaborative.ca](http://prisma.thetacollaborative.ca).

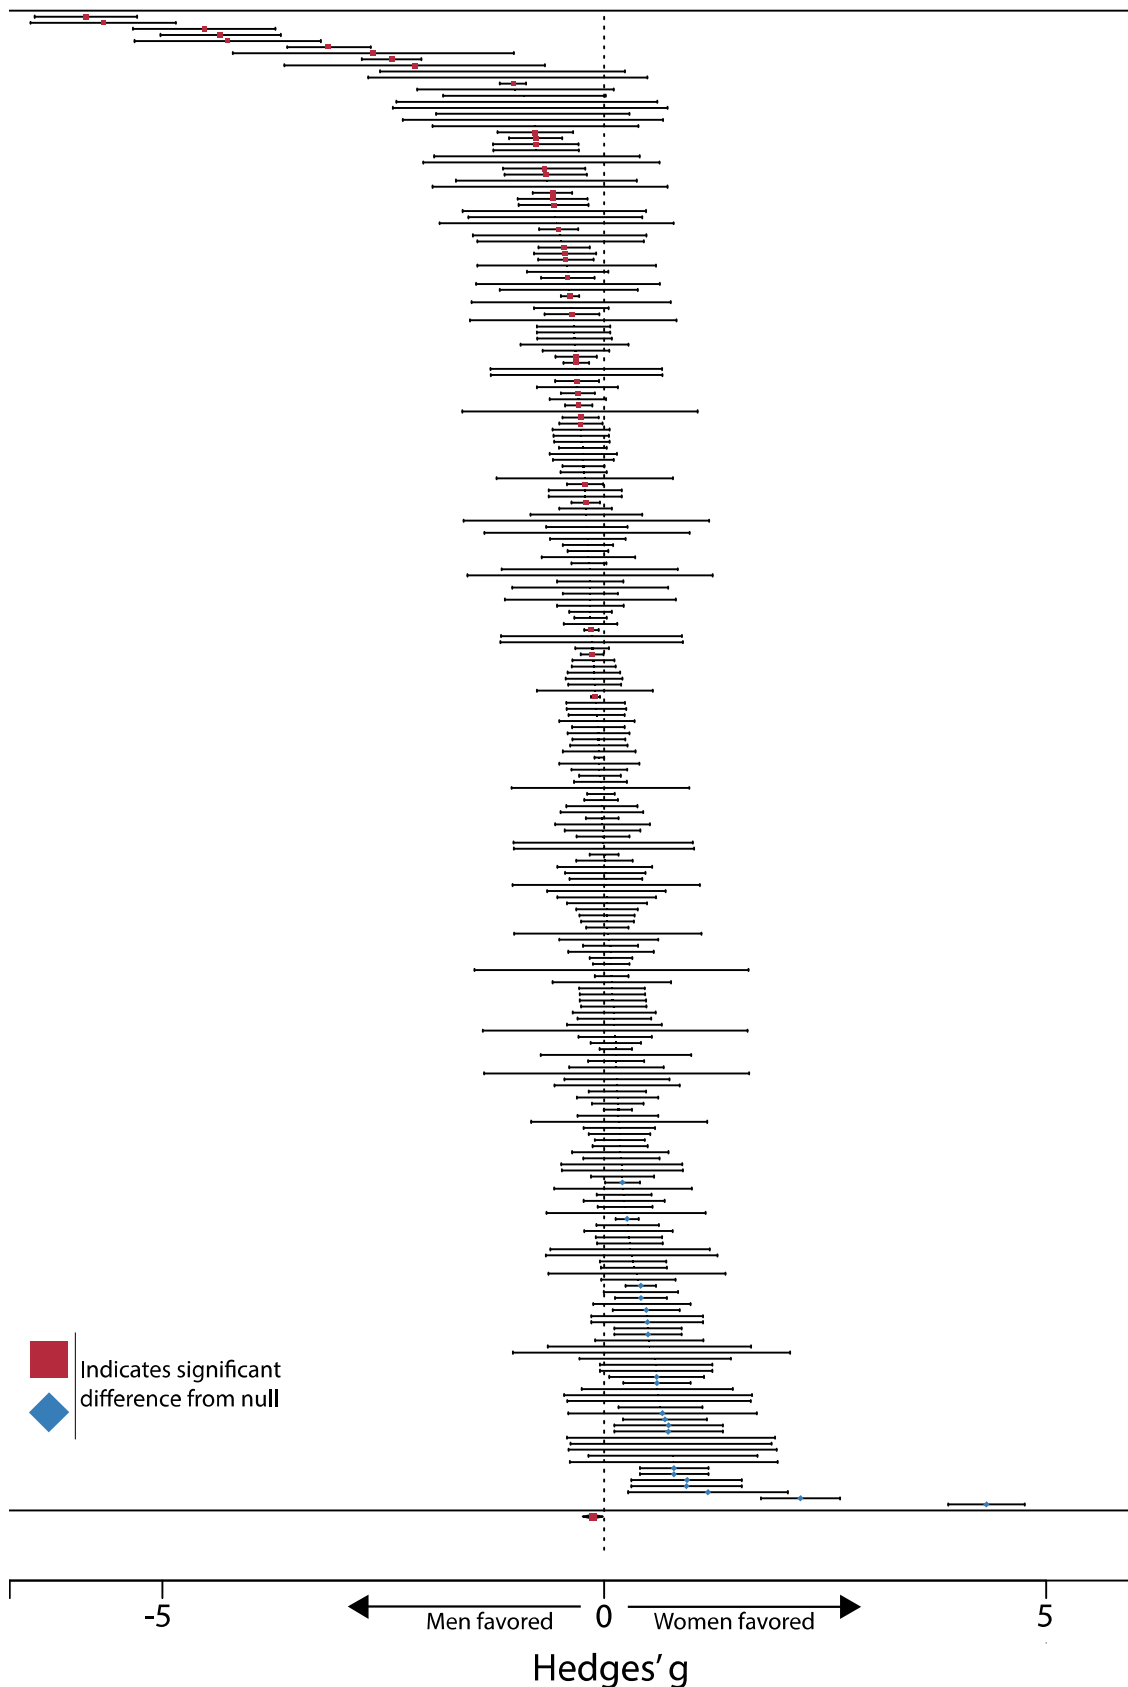

**Figure S2.** Full forest plot. Red squares indicate classes with significant gender gaps favoring men; blue diamonds indicate classes with significant gender gaps favoring women. Overall, we observed a non-significant gender gap in performance outcomes.
